# Supplementary material
Source: PubMed Central journal article supplement (PMC1568935)
Supplement: pnas_0511076103_1.pdf [file pnas_0511076103_1.pdf]

**Fig. 6.** (A and B) Kit immunostaining of placebo and 7-day imatinib treated mice (40x magnification).

**Fig. 7.** Imatinib treatment decreases cell proliferation and increases apoptosis in tumor lesions of imatinib-treated  $\text{Kit}^{\text{V558}\Delta/+}$  mice. (A-D) Ki67 immunostaining of tumor sections of placebo and imatinib-treated  $\text{Kit}^{\text{V558}\Delta/+}$  mice (20x magnification). (E-H) Cleaved caspase 3 immunostaining of tumor sections of placebo and imatinib-treated mice (20x magnification). Quantification of proliferating and apoptotic cells are presented in Fig 2.

**Fig. 8.** Validation of microarray data by semiquantitative PCR analysis with RNA extracted from four placebo and four imatinib-treated tumors assaying indicated genes. In the microarray analysis, the maximum fold changes for *Ccnd3* (cyclin D3), *ifi1* (interferon-inducible protein 1) and *Fkbp1a* (FK506-binding protein 1a) were -2.14, -2.94, and -1.5, respectively, whereas for *Cdkn2C* ( $\text{p18}^{\text{ink4}}$ ) and *Tgfb1/4* (transforming growth factor beta 1-induced transcript 4), the maximum fold changes were +1.84 and +3.99, respectively.

**Fig. 9.** RAD001 treatment induces cell cycle arrest in GIST lesions of  $\text{Kit}^{\text{V558}\Delta/+}$  mice. H&E (A) and Ki67 (B) staining of tumor sections of RAD001 (10 mg/kg) treated mice (7 days). Magnification 20x. (C) Quantification of proliferating cells (percent of control) in GIST lesions of placebo, RAD001 (5 mg/kg) treated for 7 days and 4 weeks and RAD001 (10 mg/kg) for 7 days. Groups were judged to differ significantly at  $P < 0.05$  (Materials and Methods).

**Fig. 10.** Imatinib and RAD001 do not synergize in the treatment of GIST in  $\text{Kit}^{\text{V558}\Delta/+}$  mice. H&E-stained tumor sections of mice treated for 7 days with imatinib (45 mg/kg) plus RAD001 (10 mg/kg). Eight mice were treated with varied responses from mild (A) to moderate (B).

**Fig. 11.** Imatinib treatment for 7 days reduces ribosomal S6 protein phosphorylation. P-S6 protein immunostaining of tumor sections of placebo (*A*) and imatinib-treated Kit<sup>V558Δ/+</sup> mice (*B* and *C*) for 7 days (20x magnification). The reduction in S6 protein phosphorylation upon imatinib treatment seems to be independent of the degree of the histological response (*B*, minimal response; *C*, mild response; moderate response not shown) and indicates a consistent down-regulation of the translational response in GIST from 7-day imatinib-treated Kit<sup>V558Δ/+</sup> mice (see Table 1).
