# Supplementary material
Source: PubMed Central journal article supplement (PMC1568935)
Supplement: pnas_0511076103_4.pdf [file pnas_0511076103_4.pdf]

Table 2

| probe ID     | Gene Symbol    | Title                                         | P value  | meanSig placebo | meanSig 6h | meanSig 24h | maxFC | Location        |
|--------------|----------------|-----------------------------------------------|----------|-----------------|------------|-------------|-------|-----------------|
| 1423232_at   | Etv4           | ets variant gene 4 (E1A enhancer binding pr   | 7.64E-11 | 8.72            | 4.34       | 4.37        | 20.79 | Chr:11 60.0 cM  |
| 1417141_at   | Igtp           | interferon gamma induced GTPase               | 2.68E-09 | 12.96           | 11.41      | 10.92       | 4.11  | Chr:11 32.0 cM  |
| 1419043_a_at | Iigp-pending   | interferon-inducible GTPase                   | 1.87E-08 | 14.03           | 12.03      | 12.09       | 3.99  | Chr:18 E1       |
| 1415753_at   | BC005632       | cDNA sequence BC005632                        | 2.17E-08 | 12.22           | 10.74      | 10.78       | 2.78  | Chr:10 C1       |
| 1421204_a_at | 2310041H06Rik  | RIKEN cDNA 2310041H06 gene                    | 2.57E-08 | 7.59            | 8.97       | 8.93        | 2.61  | Chr:9 F1        |
| 1438761_a_at | Odc            | ornithine decarboxylase, structural           | 2.64E-08 | 12.22           | 10.05      | 10.17       | 4.52  | Chr:12 6.0 cM   |
| 1423358_at   | 1810009K13Rik  | RIKEN cDNA 1810009K13 gene                    | 5.15E-08 | 8.65            | 7.86       | 7.76        | 1.85  | Chr:16 A1       |
| 1421260_a_at | Srm            | spermidine synthase                           | 9.59E-08 | 10.56           | 9.00       | 9.35        | 2.96  | Chr:4 E2        |
| 1416048_at   | Phc2           | polyhomeotic-like 2 (Drosophila)              | 1.03E-07 | 10.94           | 9.81       | 10.01       | 2.20  | Chr:4 61.0 cM   |
| 1422886_a_at | Clk4           | CDC like kinase 4                             | 1.09E-07 | 8.21            | 9.21       | 9.11        | 2.00  | Chr:11 B1.3     |
| 1416699_at   | 1110008F13Rik  | RIKEN cDNA 1110008F13 gene                    | 1.11E-07 | 11.87           | 11.12      | 11.25       | 1.68  | Chr:2 H1        |
| 1417040_a_at | Bok            | Bcl-2-related ovarian killer protein          | 1.12E-07 | 11.34           | 9.25       | 9.29        | 4.27  | Chr:1 D         |
| 1416366_at   | 1810004I06Rik  | RIKEN cDNA 1810004I06 gene                    | 1.26E-07 | 12.73           | 11.99      | 11.77       | 1.94  | Chr:7 E1        |
| 1434380_at   | ---            | Mus musculus diabetic nephropathy-related i   | 1.78E-07 | 11.46           | 9.81       | 9.52        | 3.85  | ---             |
| 1451083_s_at | Aars           | alanyl-tRNA synthetase                        | 1.92E-07 | 10.60           | 9.74       | 9.43        | 2.25  | Chr:8 E1        |
| 1427312_at   | 2310076E16Rik  | RIKEN cDNA 2310076E16 gene                    | 2.16E-07 | 6.45            | 8.05       | 7.89        | 3.03  | Chr:13 C3       |
| 1426546_at   | Tesk2          | testis-specific kinase 2                      | 2.30E-07 | 6.76            | 7.73       | 7.64        | 1.97  | Chr:4 D1        |
| 1419042_at   | Iigp-pending   | interferon-inducible GTPase                   | 2.30E-07 | 12.24           | 9.83       | 9.67        | 5.94  | Chr:18 E1       |
| 1460330_at   | Anxa3          | annexin A3                                    | 2.75E-07 | 12.95           | 11.78      | 11.76       | 2.28  | Chr:5 54.0 cM   |
| 1449056_at   | E330009J07Rik  | RIKEN cDNA E330009J07 gene                    | 3.58E-07 | 7.84            | 8.80       | 8.64        | 1.95  | Chr:6 B1        |
| 1416584_at   | Man2b2         | mannosidase 2, alpha B2                       | 3.84E-07 | 7.01            | 7.84       | 7.77        | 1.78  | Chr:5 B2-13.3   |
| 1427894_at   | Slit2          | Slit-like 2 (Drosophila)                      | 4.01E-07 | 9.37            | 8.18       | 8.50        | 2.28  | Chr:16 A1       |
| 1448529_at   | Thbd           | thrombomodulin                                | 4.55E-07 | 11.46           | 9.51       | 9.82        | 3.88  | Chr:2 84.0 cM   |
| 1424464_s_at | AW212394       | expressed sequence AW212394                   | 4.87E-07 | 5.71            | 6.88       | 6.93        | 2.33  | Chr:1 C1.1      |
| 1416488_at   | Ccng2          | cyclin G2                                     | 5.32E-07 | 8.88            | 9.88       | 9.89        | 2.01  | Chr:5 E3.3-F1.3 |
| 1427364_a_at | Odc            | ornithine decarboxylase, structural           | 5.54E-07 | 9.94            | 8.28       | 8.50        | 3.17  | Chr:12 6.0 cM   |
| 1431591_s_at | G1p2           | interferon, alpha-inducible protein           | 5.88E-07 | 11.07           | 8.96       | 9.02        | 4.31  | Chr:4 E2        |
| 1433691_at   | Ppp1r3c        | protein phosphatase 1, regulatory (inhibitor) | 5.98E-07 | 4.82            | 8.76       | 8.82        | 16.04 | Chr:19 C2       |
| 1437711_x_at | Odc            | ornithine decarboxylase, structural           | 6.17E-07 | 11.01           | 9.25       | 9.40        | 3.37  | Chr:12 6.0 cM   |
| 1424182_at   | Acat1          | acetyl-Coenzyme A acetyltransferase 1         | 6.25E-07 | 9.79            | 9.07       | 8.68        | 2.15  | Chr:9 30.0 cM   |
| 1429379_at   | Xlkd1          | extra cellular link domain-containing 1       | 6.65E-07 | 12.82           | 11.67      | 11.67       | 2.22  | Chr:7 E3        |
| 1431086_s_at | Pcmt1          | protein-L-isoaspartate (D-aspartate) O-meth   | 7.16E-07 | 8.60            | 7.87       | 7.86        | 1.66  | Chr:10 7.0 cM   |
| 1418825_at   | Ifi1           | interferon inducible protein 1                | 7.75E-07 | 11.50           | 9.94       | 9.88        | 3.08  | Chr:11 B1.2     |
| 1430127_a_at | Ccnd2          | cyclin D2                                     | 8.08E-07 | 12.77           | 11.79      | 11.51       | 2.39  | Chr:6 61.1 cM   |
| 1424737_at   | Thrsp          | thyroid hormone responsive SPOT14 homolo      | 8.55E-07 | 13.55           | 11.87      | 11.43       | 4.36  | Chr:7 E1        |
| 1416949_s_at | H2-Ke4         | H2-K region expressed gene 4                  | 8.92E-07 | 10.50           | 9.96       | 9.92        | 1.49  | Chr:17 18.48 cM |
| 1426499_at   | Sh3glb2        | SH3-domain GRB2-like endophilin B2            | 9.37E-07 | 11.38           | 10.49      | 10.49       | 1.85  | Chr:2 B         |
| 1430005_a_at | 4933430F08Rik  | RIKEN cDNA 4933430F08 gene                    | 9.48E-07 | 10.55           | 8.69       | 8.64        | 3.76  | Chr:19 A        |
| 1437239_x_at | Phc2           | polyhomeotic-like 2 (Drosophila)              | 9.53E-07 | 11.72           | 10.69      | 10.91       | 2.04  | Chr:4 61.0 cM   |
| 1452161_at   | AW558171       | expressed sequence AW558171                   | 1.02E-06 | 7.70            | 9.26       | 9.19        | 2.94  | Chr:3 E1        |
| 1422758_at   | Chst2          | carbohydrate sulfotransferase 2               | 1.04E-06 | 10.26           | 8.71       | 8.10        | 4.48  | ---             |
| 1422973_a_at | Thrsp          | thyroid hormone responsive SPOT14 homolo      | 1.04E-06 | 12.19           | 10.37      | 9.79        | 5.29  | Chr:7 E1        |
| 1421019_at   | 1700021F05Rik  | RIKEN cDNA 1700021F05 gene                    | 1.05E-06 | 9.74            | 9.11       | 8.87        | 1.83  | Chr:10 B2       |
| 1421818_at   | Bcl6           | B-cell leukemia/lymphoma 6                    | 1.12E-06 | 6.22            | 8.23       | 8.62        | 5.26  | Chr:16 13.9 cM  |
| 1453128_at   | Xlkd1          | extra cellular link domain-containing 1       | 1.19E-06 | 12.69           | 11.38      | 11.49       | 2.49  | Chr:7 E3        |
| 1415907_at   | Ccnd3          | cyclin D3                                     | 1.24E-06 | 11.74           | 10.65      | 10.69       | 2.14  | Chr:17 28.8 cM  |
| 1429692_s_at | Gch            | GTP cyclohydrolase 1                          | 1.26E-06 | 8.12            | 6.97       | 6.91        | 2.32  | Chr:14 19.5 cM  |
| 1428374_at   | 1110017N23Rik  | RIKEN cDNA 1110017N23 gene                    | 1.31E-06 | 7.62            | 8.42       | 8.36        | 1.74  | Chr:9 B         |
| 1452178_at   | Plec1          | plectin 1                                     | 1.59E-06 | 10.85           | 10.14      | 10.04       | 1.75  | Chr:15 44.0 cM  |
| 1429360_at   | Klf3           | Kruppel-like factor 3 (basic)                 | 1.75E-06 | 8.79            | 9.48       | 9.72        | 1.90  | Chr:5 C3.1      |
| 1423549_at   | Slc1a4         | solute carrier family 1 (glutamate/neutral an | 1.75E-06 | 7.18            | 4.75       | 4.55        | 6.20  | Chr:11 10.92 cM |
| 1428710_at   | Rit1           | Ras-like without CAAX 1                       | 1.78E-06 | 7.61            | 8.30       | 8.26        | 1.62  | Chr:3 F1        |
| 1455271_at   | 1500011J06Rik  | RIKEN cDNA 1500011J06 gene                    | 1.81E-06 | 13.48           | 11.79      | 11.55       | 3.80  | ---             |
| 1418884_x_at | Tuba1          | tubulin, alpha 1                              | 1.89E-06 | 12.78           | 11.43      | 11.64       | 2.55  | Chr:15 60.4 cM  |
| 1455019_x_at | 5630400A09Rik  | RIKEN cDNA 5630400A09 gene                    | 1.97E-06 | 11.28           | 10.42      | 10.18       | 2.15  | Chr:10 C1       |
| 1417053_at   | Phb            | prohibitin                                    | 2.05E-06 | 10.94           | 9.98       | 10.01       | 1.94  | Chr:11 55.6 cM  |
| 1450911_at   | Ppib           | peptidylprolyl isomerase B                    | 2.12E-06 | 13.16           | 12.76      | 12.70       | 1.37  | Chr:9 C         |
| 1452209_at   | Pkp4           | plakophilin 4                                 | 2.13E-06 | 7.58            | 8.93       | 9.04        | 2.74  | Chr:2 C1.1      |
| 1434954_at   | Mpp5           | membrane protein, palmitoylated 5 (MAGUK      | 2.46E-06 | 8.15            | 8.61       | 8.61        | 1.38  | Chr:12 C3       |
| 1421217_a_at | Lgals9         | lectin, galactose binding, soluble 9          | 2.67E-06 | 12.76           | 11.66      | 11.63       | 2.19  | Chr:11 B5       |
| 1456107_x_at | Snrp116-pendir | U5 small nuclear ribonucleoprotein            | 2.68E-06 | 12.35           | 10.80      | 10.58       | 3.40  | Chr:11 E1       |
| 1419905_s_at | Hpgd           | hydroxyprostaglandin dehydrogenase 15 (NF     | 2.78E-06 | 9.46            | 11.74      | 11.75       | 4.88  | Chr:8 B3.2      |
| 1423685_at   | Aars           | alanyl-tRNA synthetase                        | 2.90E-06 | 10.33           | 9.64       | 9.52        | 1.75  | Chr:8 E1        |
| 1416315_at   | 1110035H23Rik  | RIKEN cDNA 1110035H23 gene                    | 3.04E-06 | 9.53            | 10.05      | 10.09       | 1.48  | Chr:14 C1       |
| 1422429_at   | Rnf14          | ring finger protein 14                        | 3.05E-06 | 11.20           | 10.78      | 10.77       | 1.35  | Chr:18 17.0 cM  |
| 1421082_s_at | Banf1          | barrier to autointegration factor 1           | 3.11E-06 | 11.41           | 10.88      | 11.01       | 1.45  | Chr:19 A        |
| 1423794_at   | D2Erttd391e    | DNA segment, Chr 2, ERATO Doi 391, expres     | 3.20E-06 | 7.18            | 8.09       | 8.10        | 1.90  | Chr:2 E1        |
| 1452160_at   | AW558171       | expressed sequence AW558171                   | 3.23E-06 | 7.03            | 8.82       | 9.16        | 4.37  | Chr:3 E1        |
| 1426381_at   | BC013720       | cDNA sequence BC013720                        | 3.27E-06 | 8.22            | 7.37       | 7.51        | 1.80  | Chr:19 C3       |
| 1424775_at   | Oas1g          | 2'-5' oligoadenylate synthetase 1G            | 3.42E-06 | 11.85           | 11.12      | 11.01       | 1.80  | Chr:5 67.0 cM   |
| 1416541_at   | Skd3           | suppressor of K+ transport defect 3           | 3.65E-06 | 8.58            | 8.39       | 7.80        | 1.72  | Chr:7 E1        |
| 1418571_at   | Tnfrsf12a      | tumor necrosis factor receptor superfamily, r | 3.69E-06 | 9.98            | 4.78       | 5.84        | 36.67 | Chr:17 A3.3     |
| 1425921_a_at | 1810055G02Rik  | RIKEN cDNA 1810055G02 gene                    | 3.94E-06 | 9.34            | 8.07       | 7.96        | 2.61  | Chr:19 A        |
| 1448442_a_at | Psma3          | proteasome (prosome, macropain) subunit, i    | 3.96E-06 | 12.18           | 11.70      | 11.61       | 1.49  | Chr:12 C2       |
| 1424050_s_at | Fgfr1          | fibroblast growth factor receptor 1           | 4.05E-06 | 11.74           | 10.45      | 10.32       | 2.68  | Chr:8 10.0 cM   |
| 1425780_a_at | 0610041E09Rik  | RIKEN cDNA 0610041E09 gene                    | 4.09E-06 | 10.62           | 10.08      | 9.93        | 1.62  | Chr:13 C3       |
