# Supplementary material
Source: PubMed Central journal article supplement (PMC1568935)
Supplement: pnas_0511076103_5.pdf [file pnas_0511076103_5.pdf]

Table 3

| probe ID     | Gene Symbol   | Title                                          | P value  | meanSig placebr | meanSig 6h  | maxFC       | Location        |
|--------------|---------------|------------------------------------------------|----------|-----------------|-------------|-------------|-----------------|
| 1423232_at   | Etv4          | ets variant gene 4 (E1A enhancer binding pr    | 1.00E-08 | 8.721929086     | 4.34421533  | 20.78849996 | Chr:11 60.0 cM  |
| 1428710_at   | Rit1          | Ras-like without CAAX 1                        | 9.99E-07 | 7.611077998     | 8.304836724 | 1.617492167 | Chr:3 F1        |
| 1421204_a_at | 2310041H06Rik | RIKEN cDNA 2310041H06 gene                     | 1.20E-06 | 7.585506607     | 8.968121164 | 2.60740476  | Chr:9 F1        |
| 1452161_at   | AW558171      | expressed sequence AW558171                    | 1.25E-06 | 7.699854118     | 9.257527863 | 2.943787931 | Chr:3 E1        |
| 1425319_s_at | 6530403A03Rik | RIKEN cDNA 6530403A03 gene                     | 3.27E-06 | 7.643355923     | 8.28632993  | 1.561544851 | Chr:13 A3.3     |
| 1454606_at   | 4933426M11Rik | RIKEN cDNA 4933426M11 gene                     | 3.81E-06 | 9.736594835     | 8.944774519 | 1.731257493 | Chr:12 C3       |
| 1419043_a_at | Iigp-pending  | interferon-inducible GTPase                    | 4.31E-06 | 14.02701745     | 12.03060945 | 3.990053257 | Chr:18 E1       |
| 1460330_at   | Anxa3         | annexin A3                                     | 4.68E-06 | 12.95425151     | 11.77908814 | 2.258184507 | Chr:5 54.0 cM   |
| 1415753_at   | BC005632      | cDNA sequence BC005632                         | 4.84E-06 | 12.21720102     | 10.74376502 | 2.776824503 | Chr:10 C1       |
| 1416048_at   | Phc2          | polyhomeotic-like 2 (Drosophila)               | 4.99E-06 | 10.9416649      | 9.807119762 | 2.195493314 | Chr:4 61.0 cM   |
| 1420697_at   | Slc15a3       | solute carrier family 15, member 3             | 5.51E-06 | 9.919236309     | 8.404059963 | 2.858337643 | Chr:19 A        |
| 1421163_a_at | Nfia          | nuclear factor I/A                             | 5.74E-06 | 6.653220172     | 7.675109496 | 2.030576421 | Chr:4 45.8 cM   |
| 1427894_at   | Slit2         | Slit-like 2 (Drosophila)                       | 6.50E-06 | 9.366366861     | 8.177825491 | 2.27922187  | Chr:16 A1       |
| 1417040_a_at | Bok           | Bcl-2-related ovarian killer protein           | 7.00E-06 | 11.34369947     | 9.248044187 | 4.274202556 | Chr:1 D         |
| 1417141_at   | Igtp          | interferon gamma induced GTPase                | 7.04E-06 | 12.95696657     | 11.41159626 | 2.918789778 | Chr:11 32.0 cM  |
| 1448698_at   | Ccnd1         | cyclin D1                                      | 7.17E-06 | 11.12540899     | 9.786963652 | 2.528786675 | Chr:7 72.3 cM   |
| 1435866_s_at | Hist3h2a      | histone 3, H2a                                 | 7.80E-06 | 9.577833649     | 10.87885051 | 2.464024945 | ---             |
| 1424617_at   | 2010008K16Rik | RIKEN cDNA 2010008K16 gene                     | 9.60E-06 | 10.50447564     | 9.614658076 | 1.852941794 | Chr:11 D        |
| 1424464_s_at | AW212394      | expressed sequence AW212394                    | 1.02E-05 | 5.713530494     | 6.882644603 | 2.248735702 | Chr:1 C1.1      |
| 1415907_at   | Ccnd3         | cyclin D3                                      | 1.22E-05 | 11.74414725     | 10.64765225 | 2.138345539 | Chr:17 28.8 cM  |
| 1449056_at   | E330009J07Rik | RIKEN cDNA E330009J07 gene                     | 1.28E-05 | 7.842898315     | 8.80304804  | 1.945511792 | Chr:6 B1        |
| 1438761_a_at | Odc           | ornithine decarboxylase, structural            | 1.31E-05 | 12.22307987     | 10.04730827 | 4.518273483 | Chr:12 6.0 cM   |
| 1419042_at   | Iigp-pending  | interferon-inducible GTPase                    | 1.40E-05 | 12.24024227     | 9.828726691 | 5.320329433 | Chr:18 E1       |
| 1453939_x_at | G1p2          | interferon, alpha-inducible protein            | 1.70E-05 | 7.476063189     | 5.406048787 | 4.198908651 | Chr:4 E2        |
| 1421065_at   | Jak2          | Janus kinase 2                                 | 1.84E-05 | 7.738933127     | 8.564091479 | 1.771729495 | Chr:19 24.0 cM  |
| 1419366_at   | 2610510L01Rik | RIKEN cDNA 2610510L01 gene                     | 2.09E-05 | 7.759733659     | 8.530145886 | 1.70557107  | Chr:11 A1       |
| 1433691_at   | Ppp1r3c       | protein phosphatase 1, regulatory (inhibitor   | 2.10E-05 | 4.819756573     | 8.761856167 | 15.37057887 | Chr:19 C2       |
| 1426546_at   | Testk2        | testis-specific kinase 2                       | 2.31E-05 | 6.755676175     | 7.732122932 | 1.967613362 | Chr:4 D1        |
| 1418825_at   | Ifi1          | interferon inducible protein 1                 | 2.45E-05 | 11.49998817     | 9.944634964 | 2.939056728 | Chr:11 B1.2     |
| 1418580_at   | 5830458K16Rik | RIKEN cDNA 5830458K16 gene                     | 2.46E-05 | 12.02287028     | 10.62817034 | 2.629338602 | Chr:16 A1       |
| 1426467_s_at | 0610037L13Rik | RIKEN cDNA 0610037L13 gene                     | 2.47E-05 | 9.491027648     | 8.424082653 | 2.094992379 | Chr:4 C7        |
| 1426499_at   | Sh3glb2       | SH3-domain GRB2-like endophilin B2             | 2.55E-05 | 11.38283025     | 10.4927961  | 1.853219998 | Chr:2 B         |
| 1436362_x_at | ---           | ---                                            | 2.98E-05 | 7.387034397     | 8.394939686 | 2.010989138 | ---             |
| 1437239_x_at | Phc2          | polyhomeotic-like 2 (Drosophila)               | 3.02E-05 | 11.72024614     | 10.69012602 | 2.042194271 | Chr:4 61.0 cM   |
| 1422973_a_at | Thrsp         | thyroid hormone responsive SPOT14 homolc       | 3.15E-05 | 12.19326238     | 10.37455308 | 3.527654576 | Chr:7 E1        |
| 1416366_at   | 1810004I06Rik | RIKEN cDNA 1810004I06 gene                     | 3.23E-05 | 12.73018743     | 11.99367153 | 1.666147237 | Chr:7 E1        |
| 1426915_at   | Dapk1         | death associated protein kinase 1              | 3.36E-05 | 7.111584647     | 7.753899191 | 1.560831223 | Chr:13 40.0 cM  |
| 1416584_at   | Man2b2        | mannosidase 2, alpha B2                        | 3.42E-05 | 7.012625128     | 7.841036581 | 1.775729035 | Chr:5 B2-13.3   |
| 1416488_at   | Ccng2         | cyclin G2                                      | 3.73E-05 | 8.881957244     | 9.884116344 | 2.002995389 | Chr:5 E3.3-F1.3 |
| 1449445_x_at | Mfap1         | microfibrillar-associated protein 1            | 3.84E-05 | 9.547236281     | 10.15398115 | 1.522819414 | Chr:2 E5        |
| 1448242_at   | Sec61a1       | Sec61 alpha 1 subunit (S. cerevisiae)          | 3.96E-05 | 11.31463349     | 10.6449644  | 1.59070806  | Chr:6 D1        |
| 1418780_at   | Cyp39a1       | cytochrome P450, family 39, subfamily a, pr    | 4.08E-05 | 6.045122151     | 7.523529604 | 2.786409802 | Chr:17 B3       |
| 1431086_s_at | Pcmt1         | protein-L-isoaspartate (D-aspartate) O-metf    | 4.11E-05 | 8.599037403     | 7.868226285 | 1.659571881 | Chr:10 7.0 cM   |
| 1448529_at   | Thbd          | thrombomodulin                                 | 4.11E-05 | 11.46369398     | 9.507113906 | 3.881407959 | Chr:2 84.0 cM   |
| 1449934_at   | Pura          | purine rich element binding protein A          | 4.12E-05 | 9.093542082     | 10.04275248 | 1.93081561  | Chr:18 B2       |
| 1429379_at   | Xlkd1         | extra cellular link domain-containing 1        | 4.26E-05 | 12.82179544     | 11.67091343 | 2.220496049 | Chr:7 E3        |
| 1430005_a_at | 4933430F08Rik | RIKEN cDNA 4933430F08 gene                     | 4.51E-05 | 10.55427867     | 8.686844327 | 3.64883102  | Chr:19 A        |
| 1431591_s_at | G1p2          | interferon, alpha-inducible protein            | 4.69E-05 | 11.06880345     | 8.962477375 | 4.3059336   | Chr:4 E2        |
| 1427364_a_at | Odc           | ornithine decarboxylase, structural            | 4.74E-05 | 9.941818646     | 8.279299472 | 3.165688216 | Chr:12 6.0 cM   |
| 1428626_at   | 2210402C18Rik | RIKEN cDNA 2210402C18 gene                     | 5.00E-05 | 9.715200907     | 8.921233115 | 1.733836419 | Chr:9 D         |
| 1425109_at   | BC010552      | cDNA sequence BC010552                         | 5.01E-05 | 7.125595335     | 8.340863993 | 2.32184016  | Chr:3 G1        |
| 1423358_at   | 1810009K13Rik | RIKEN cDNA 1810009K13 gene                     | 5.01E-05 | 8.646171435     | 7.860923723 | 1.723388201 | Chr:16 A1       |
| 1419025_at   | Sag           | retinal S-antigen                              | 5.22E-05 | 8.073883424     | 7.269403379 | 1.746516225 | Chr:1 53.6 cM   |
| 1424531_a_at | Tcea3         | transcription elongation factor A (SII), 3     | 5.50E-05 | 7.232246033     | 8.183273146 | 1.933248526 | Chr:4 D3        |
| 1448825_at   | Pdk2          | pyruvate dehydrogenase kinase, isoenzyme       | 5.56E-05 | 8.595992792     | 9.254384377 | 1.578322022 | Chr:11 55.5 cM  |
| 1416699_at   | 1110008F13Rik | RIKEN cDNA 1110008F13 gene                     | 5.60E-05 | 11.87133364     | 11.12038001 | 1.682904883 | Chr:2 H1        |
| 1455271_at   | 1500011J06Rik | RIKEN cDNA 1500011J06 gene                     | 5.89E-05 | 13.47960421     | 11.78807901 | 3.229979927 | ---             |
| 1424906_at   | E030024M05Rik | RIKEN cDNA E030024M05 gene                     | 5.96E-05 | 8.997109745     | 9.644415228 | 1.5662402   | Chr:12 A1.2     |
| 1435277_x_at | Nme1          | expressed in non-metastatic cells 1, protein   | 6.16E-05 | 10.45751911     | 9.431065814 | 2.037010335 | Chr:11 D        |
| 1419126_at   | Hoxd9         | homeo box D9                                   | 6.18E-05 | 10.12490858     | 11.58733013 | 2.755705186 | Chr:2 45.0 cM   |
| 1434704_at   | Srpk2         | serine/arginine-rich protein specific kinase 2 | 6.24E-05 | 8.935703056     | 9.57963684  | 1.56258404  | Chr:5 9.0 cM    |
| 1417172_at   | Ubce8         | ubiquitin-conjugating enzyme 8                 | 6.38E-05 | 7.966574455     | 7.007289141 | 1.944346461 | Chr:2 D         |
| 1453128_at   | Xlkd1         | extra cellular link domain-containing 1        | 6.44E-05 | 12.69015838     | 11.37628854 | 2.486075044 | Chr:7 E3        |
| 1437711_x_at | Odc           | ornithine decarboxylase, structural            | 6.53E-05 | 11.00853004     | 9.254429985 | 3.373158372 | Chr:12 6.0 cM   |
| 1418884_x_at | Tuba1         | tubulin, alpha 1                               | 6.77E-05 | 12.77516536     | 11.42669048 | 2.546427921 | Chr:15 60.4 cM  |
| 1455019_x_at | 5630400A09Rik | RIKEN cDNA 5630400A09 gene                     | 6.81E-05 | 11.2805539      | 10.42469672 | 1.809833757 | Chr:10 C1       |
| 1451083_s_at | Aars          | alanyl-tRNA synthetase                         | 6.85E-05 | 10.59604858     | 9.737289596 | 1.813477668 | Chr:8 E1        |
| 1453063_at   | Cltb          | clathrin, light polypeptide (Lcb)              | 6.87E-05 | 10.35839171     | 9.640860205 | 1.644366066 | Chr:13 B1       |
| 1435133_at   | Ugcg          | UDP-glucose ceramide glucosyltransferase       | 6.89E-05 | 11.63389509     | 10.34061501 | 2.450846403 | Chr:4 32.0 cM   |
| 1434839_s_at | 8030499H02Rik | RIKEN cDNA 8030499H02 gene                     | 6.99E-05 | 8.735719715     | 9.396243288 | 1.58065616  | Chr:3 A3        |
| 1418571_at   | Tnfrsf12a     | tumor necrosis factor receptor superfamily, I  | 7.11E-05 | 9.980542032     | 4.784112503 | 36.66748801 | Chr:17 A3.3     |
| 1417277_at   | Cyp4f16       | cytochrome P450, family 4, subfamily f, poly   | 7.30E-05 | 9.445911897     | 8.695132775 | 1.682701322 | Chr:17 B1       |
| 1436680_s_at | Acp2          | acid phosphatase 2, lysosomal                  | 7.32E-05 | 6.511026838     | 7.190015682 | 1.601017242 | Chr:2 52.0 cM   |

|              |               |                                                |             |             |             |             |                 |
|--------------|---------------|------------------------------------------------|-------------|-------------|-------------|-------------|-----------------|
| 1434380_at   | ---           | Mus musculus diabetic nephropathy-related      | 7.60E-05    | 11.46460088 | 9.805008646 | 3.159272181 | ---             |
| 1416700_at   | Arhe          | ras homolog gene family, member E              | 7.74E-05    | 9.53764352  | 10.9255938  | 2.617065947 | Chr:2 C1.1      |
| 1429692_s_at | Gch           | GTP cyclohydrolase 1                           | 7.76E-05    | 8.121043669 | 6.971504993 | 2.218429454 | Chr:14 19.5 cM  |
| 1417053_at   | Phb           | prohibitin                                     | 7.87E-05    | 10.93940701 | 9.982073613 | 1.941717611 | Chr:11 55.6 cM  |
| 1448250_at   | 9030425E11Rik | RIKEN cDNA 9030425E11 gene                     | 8.06E-05    | 11.20084505 | 10.13621292 | 2.091636475 | Chr:9 A5.1      |
| 1455841_s_at | Grwd1         | glutamate-rich WD repeat containing 1          | 8.23E-05    | 8.7770956   | 7.997912007 | 1.716159441 | Chr:4           |
| 1421260_a_at | Srm           | spermidine synthase                            | 8.37E-05    | 10.56269358 | 8.998956579 | 2.956185907 | Chr:4 E2        |
| 1426381_at   | BC013720      | cDNA sequence BC013720                         | 8.80E-05    | 8.219876184 | 7.368785993 | 1.803863522 | Chr:19 C3       |
| 1453076_at   | 9130211I03Rik | RIKEN cDNA 9130211I03 gene                     | 8.99E-05    | 9.427272402 | 8.29925559  | 2.185580947 | Chr:1 H6        |
| 1419156_at   | Sox4          | SRY-box containing gene 4                      | 9.43E-05    | 6.56554375  | 8.748895854 | 4.542076813 | Chr:13 20.0 cM  |
| 1424955_at   | BC024400      | cDNA sequence BC024400                         | 9.71E-05    | 7.295935435 | 7.927890662 | 1.549663769 | Chr:18 E3       |
| 1438415_s_at | Carm1-pending | coactivator-associated arginine methyltransf   | 9.71E-05    | 7.274469396 | 7.975548733 | 1.625720603 | ---             |
| 1452160_at   | AW558171      | expressed sequence AW558171                    | 9.92E-05    | 7.031131483 | 8.815268794 | 3.444124537 | Chr:3 E1        |
| 1448104_at   | Aldh6a1       | aldehyde dehydrogenase family 6, subfamily     | 0.000101141 | 7.832259402 | 8.618652929 | 1.724757492 | Chr:12 D1       |
| 1425921_a_at | 1810055G02Rik | RIKEN cDNA 1810055G02 gene                     | 0.000101309 | 9.344322969 | 8.0708865   | 2.41736692  | Chr:19 A        |
| 1423274_at   | Ddx26         | DEAD/H (Asp-Glu-Ala-Asp/His) box polypept      | 0.000105996 | 10.30788708 | 8.840939418 | 2.76436413  | Chr:3 F2.2      |
| 1417419_at   | Ccnd1         | cyclin D1                                      | 0.000106417 | 9.20372019  | 7.843802077 | 2.566706106 | Chr:7 72.3 cM   |
| 1433899_x_at | Tgfb14        | transforming growth factor beta 1 induced t    | 0.000109253 | 10.50291422 | 12.50217707 | 3.997956709 | Chr:14 42.0 cM  |
| 1424737_at   | Thrsp         | thyroid hormone responsive SPOT14 homolc       | 0.000110075 | 13.5509319  | 11.87349138 | 3.198599867 | Chr:7 E1        |
| 1427911_at   | 2610307O08Rik | RIKEN cDNA 2610307O08 gene                     | 0.000110384 | 10.77107388 | 9.210230506 | 2.95026261  | Chr:18 B2       |
| 1428296_at   | Tm4sf7        | transmembrane 4 superfamily member 7           | 0.000110764 | 11.8550407  | 10.96055153 | 1.858951551 | Chr:7 F5        |
| 1417441_at   | Jdp1-pending  | J domain protein 1                             | 0.000112809 | 7.205463121 | 8.242790676 | 2.052422227 | Chr:10 B4       |
| 1416926_at   | Trp53inp1     | transformation related protein 53 inducible r  | 0.000113974 | 9.723884529 | 11.03724797 | 2.48520255  | Chr:4 A1        |
| 1433656_a_at | C77032        | EST C77032                                     | 0.000114419 | 9.499139393 | 8.783913823 | 1.641739888 | Chr:14 11.0 cM  |
| 1459987_s_at | Cct3          | chaperonin subunit 3 (gamma)                   | 0.000114853 | 10.97845484 | 9.871436173 | 2.154000615 | Chr:3 50.0 cM   |
| 1448138_at   | Ppp2r4        | protein phosphatase 2A, regulatory subunit     | 0.000119827 | 10.32536775 | 9.353616831 | 1.961219379 | Chr:2 B         |
| 1424496_at   | 5133401N09Rik | RIKEN cDNA 5133401N09 gene                     | 0.000119138 | 10.70756386 | 10.06254257 | 1.563762366 | Chr:13 B1       |
| 1426777_a_at | Wasl          | Wiskott-Aldrich syndrome-like (human)          | 0.000124332 | 8.104719576 | 9.021704671 | 1.888165331 | Chr:6 A3.1      |
| 1449009_at   | Tgtp          | T-cell specific GTPase                         | 0.000128022 | 13.84561104 | 12.59621593 | 2.377417219 | Chr:11 B1.2     |
| 1423846_x_at | Tuba2         | tubulin, alpha 2                               | 0.000128544 | 13.65678981 | 12.79261153 | 1.820302567 | Chr:2 84.0 cM   |
| 1428374_at   | 1110017N23Rik | RIKEN cDNA 1110017N23 gene                     | 0.000131035 | 7.619131267 | 8.416775286 | 1.738260156 | Chr:9 B         |
| 1416868_at   | Cdkn2c        | cyclin-dependent kinase inhibitor 2C (p18, i   | 0.000134774 | 10.88869383 | 11.77136073 | 1.843780487 | Chr:4 24.7 cM   |
| 1452209_at   | Pkp4          | plakophilin 4                                  | 0.000136172 | 7.584342752 | 8.931764747 | 2.544570202 | Chr:2 C1.1      |
| 1451262_a_at | Jtv1-pending  | JTV1 gene                                      | 0.000138216 | 9.612324382 | 8.90393688  | 1.633976803 | Chr:5 G2        |
| 1419609_at   | Ccr1          | chemokine (C-C motif) receptor 1               | 0.000138454 | 8.913185855 | 7.818182091 | 2.13613639  | Chr:9 71.6 cM   |
| 1417292_at   | Ifi47         | interferon gamma inducible protein             | 0.000141293 | 12.31187499 | 11.04015203 | 2.414497488 | Chr:11 B1.2     |
| 1422886_a_at | Clk4          | CDC like kinase 4                              | 0.000141322 | 8.208330861 | 9.206036609 | 1.996822019 | Chr:11 B1.3     |
| 1450914_at   | Ppp1r14b      | protein phosphatase 1, regulatory (inhibitor   | 0.00014435  | 10.80134238 | 9.606401324 | 2.28935479  | Chr:19 A        |
| 1422678_at   | Dgat2         | diacylglycerol O-acyltransferase 2             | 0.000144955 | 9.51972551  | 12.00347686 | 5.593500202 | Chr:7 E1        |
| 1428029_a_at | C530002L11Rik | RIKEN cDNA C530002L11 gene                     | 0.00014742  | 10.10270394 | 10.76755778 | 1.585407654 | Chr:11 A1       |
| 1456079_x_at | Apex1         | apurinic/aprymidinic endonuclease 1            | 0.000147844 | 9.687572536 | 8.99125654  | 1.62036182  | Chr:14 18.5 cM  |
| 1425981_a_at | Rbl2          | retinoblastoma-like 2                          | 0.000148596 | 8.246570748 | 8.855203802 | 1.524813772 | Chr:8 40.99 cM  |
| 1427347_s_at | Tubb2         | tubulin, beta 2                                | 0.000149051 | 10.62503389 | 9.191643161 | 2.700807339 | Chr:13 16.0 cM  |
| 1449143_at   | 5830458K16Rik | RIKEN cDNA 5830458K16 gene                     | 0.000154104 | 7.795371642 | 5.764303386 | 4.087073693 | Chr:16 A1       |
| 1422972_s_at | Gcn5l2        | general control of amino acid synthesis-like   | 0.000154655 | 8.533238831 | 7.914627404 | 1.535396673 | Chr:11 61.4 cM  |
| 1427997_at   | 1110007M04Rik | RIKEN cDNA 1110007M04 gene                     | 0.000157228 | 9.509959298 | 8.290501651 | 2.32859162  | Chr:4 A3        |
| 1448184_at   | Fkbp1a        | FK506 binding protein 1a                       | 0.000159024 | 11.14371965 | 10.55487946 | 1.504037138 | Chr:2 G3        |
| 1419022_a_at | Eno1          | enolase 1, alpha non-neuron                    | 0.000176912 | 13.64663065 | 12.81768019 | 1.776392582 | Chr:4 E2        |
| 1452679_at   | 2410129E14Rik | RIKEN cDNA 2410129E14 gene                     | 0.000177841 | 7.751270628 | 6.093208625 | 3.155922994 | Chr:13 A3.3     |
| 1423136_at   | Fgf1          | fibroblast growth factor 1                     | 0.000179753 | 12.14830739 | 11.23345573 | 1.885375199 | Chr:18 19.0 cM  |
| 1426414_a_at | Rnf7          | ring finger protein 7                          | 0.000179816 | 11.42571066 | 10.44355336 | 1.975417092 | Chr:9 E3.3      |
| 1448028_at   | C530046L02Rik | RIKEN cDNA C530046L02 gene                     | 0.000181205 | 5.478590339 | 6.992408047 | 2.855647111 | Chr:17 A3.3     |
| 1436420_a_at | Ipo4          | importin 4                                     | 0.000183386 | 9.662187918 | 8.952499895 | 1.635450419 | Chr:14 20.0 cM  |
| 1435865_at   | Hist3h2a      | histone 3, H2a                                 | 0.000186066 | 10.6358869  | 11.62978279 | 1.991555775 | ---             |
| 1423549_at   | Slc1a4        | solute carrier family 1 (glutamate/neutral ar  | 0.000186881 | 7.179409126 | 4.750786243 | 5.383792782 | Chr:11 10.92 cM |
| 1455179_at   | 1110068J02Rik | RIKEN cDNA 1110068J02 gene                     | 0.000190446 | 6.344120992 | 7.389735216 | 2.064245019 | Chr:18          |
| 1422064_a_at | Zfp288        | zinc finger protein 288                        | 0.000191715 | 8.98221606  | 10.64920996 | 3.175522287 | Chr:16 28.9 cM  |
| 1454773_at   | ---           | Mus musculus, clone IMAGE:4981913, mRN.        | 0.000191949 | 8.271966409 | 8.921944749 | 1.569144637 | ---             |
| 1428126_a_at | 4921506J03Rik | RIKEN cDNA 4921506J03 gene                     | 0.000192044 | 7.754491215 | 8.835617275 | 2.115686783 | Chr:10 D2       |
| 1452215_at   | 9130401M01Rik | RIKEN cDNA 9130401M01 gene                     | 0.000195129 | 8.737932003 | 8.032397083 | 1.630749199 | Chr:15 D1       |
| 1417135_at   | Srpk2         | serine/arginine-rich protein specific kinase 2 | 0.000203174 | 9.345077834 | 10.1228434  | 1.714473455 | Chr:5 9.0 cM    |
| 1423685_at   | Aars          | alanyl-tRNA synthetase                         | 0.000203986 | 10.32813399 | 9.641665782 | 1.609338952 | Chr:8 E1        |
| 1459817_at   | ---           | Mus musculus transcribed sequence              | 0.000205221 | 9.698098436 | 8.656010672 | 2.059205431 | ---             |
| 1423141_at   | Lip1          | lysosomal acid lipase 1                        | 0.000207527 | 8.802987191 | 9.661486723 | 1.813151571 | Chr:19 C1       |
| 1439393_x_at | Ppp2r4        | protein phosphatase 2A, regulatory subunit     | 0.000224052 | 11.53781909 | 10.58913444 | 1.930112112 | Chr:2 B         |
