# Supplementary material
Source: PubMed Central journal article supplement (PMC1568935)
Supplement: pnas_0511076103_6.pdf [file pnas_0511076103_6.pdf]

Table 4

| probe ID     | Gene Symbol   | Title                                       | P value  | meanSig placeb | meanSig 24h | maxFC       | Location        |
|--------------|---------------|---------------------------------------------|----------|----------------|-------------|-------------|-----------------|
| 1423232_at   | Etv4          | ets variant gene 4 (E1A enhancer bindin     | 1.68E-07 | 8.721929086    | 4.371872805 | 20.39376556 | Chr:11 60.0 cM  |
| 1427312_at   | 2310076E16Rik | RIKEN cDNA 2310076E16 gene                  | 1.68E-07 | 6.454681971    | 7.894884822 | 2.713590173 | Chr:13 C3       |
| 1417141_at   | Igtp          | interferon gamma induced GTPase             | 4.53E-07 | 12.95696657    | 10.91748519 | 4.110977239 | Chr:11 32.0 cM  |
| 1423358_at   | 1810009K13Rik | RIKEN cDNA 1810009K13 gene                  | 7.81E-07 | 8.646171435    | 7.758843853 | 1.849746517 | Chr:16 A1       |
| 1415753_at   | BC005632      | cDNA sequence BC005632                      | 9.99E-07 | 12.21720102    | 10.77705204 | 2.713488842 | Chr:10 C1       |
| 1421818_at   | Bcl6          | B-cell leukemia/lymphoma 6                  | 1.96E-06 | 6.224568862    | 8.618980039 | 5.25762475  | Chr:16 13.9 cM  |
| 1416366_at   | 1810004I06Rik | RIKEN cDNA 1810004I06 gene                  | 2.40E-06 | 12.73018743    | 11.77142051 | 1.943647935 | Chr:7 E1        |
| 1422758_at   | Chst2         | carbohydrate sulfotransferase 2             | 2.98E-06 | 10.2648114     | 8.10275279  | 4.475530227 | ---             |
| 1418533_s_at | Fzd2          | frizzled homolog 2 (Drosophila)             | 3.00E-06 | 7.111577315    | 7.960435021 | 1.80107431  | Chr:11 E1       |
| 1438761_a_at | Odc           | ornithine decarboxylase, structural         | 3.53E-06 | 12.22307987    | 10.16627768 | 4.160630544 | Chr:12 6.0 cM   |
| 1419042_at   | Iigp-pending  | interferon-inducible GTPase                 | 3.67E-06 | 12.24024227    | 9.670949874 | 5.935182519 | Chr:18 E1       |
| 1437711_x_at | Odc           | ornithine decarboxylase, structural         | 3.84E-06 | 11.00853004    | 9.395164299 | 3.059648117 | Chr:12 6.0 cM   |
| 1421204_a_at | 2310041H06Rik | RIKEN cDNA 2310041H06 gene                  | 4.14E-06 | 7.585506607    | 8.925264531 | 2.53108845  | Chr:9 F1        |
| 1460171_at   | Cops5         | COP9 (constitutive photomorphogenic) t      | 5.25E-06 | 10.0444503     | 9.415823471 | 1.546092703 | Chr:1 3.6 cM    |
| 1416488_at   | Ccng2         | cyclin G2                                   | 5.44E-06 | 8.881957244    | 9.890257758 | 2.011540123 | Chr:5 E3.3-F1.3 |
| 1419043_a_at | Iigp-pending  | interferon-inducible GTPase                 | 5.71E-06 | 14.02701745    | 12.09062298 | 3.827479016 | Chr:18 E1       |
| 1423628_s_at | Pcdhga12      | protocadherin gamma subfamily A, 12         | 5.76E-06 | 11.57098412    | 10.92564811 | 1.564103527 | Chr:18 B3       |
| 1416699_at   | 1110008F13Rik | RIKEN cDNA 1110008F13 gene                  | 6.05E-06 | 11.87133364    | 11.2482187  | 1.54019706  | Chr:2 H1        |
| 1423549_at   | Slc1a4        | solute carrier family 1 (glutamate/neutr    | 6.08E-06 | 7.179409126    | 4.548098755 | 6.195885016 | Chr:11 10.92 cM |
| 1449007_at   | Btg3          | B-cell translocation gene 3                 | 6.10E-06 | 10.15653421    | 9.531116401 | 1.542657519 | Chr:16 A1       |
| 1451083_s_at | Aars          | eukaryl-tRNA synthetase                     | 6.32E-06 | 10.59604858    | 9.425373731 | 2.251169745 | Chr:8 E1        |
| 1424344_s_at | Eif1a         | eukaryotic translation initiation factor 1/ | 7.54E-06 | 9.44284794     | 8.633785079 | 1.752072969 | Chr:18 C        |
| 1417040_a_at | Bok           | Bcl-2-related ovarian killer protein        | 8.08E-06 | 11.34369947    | 9.289199346 | 4.153996845 | Chr:1 D         |
| 1426475_at   | Hmbs          | hydroxymethylbilane synthase                | 1.06E-05 | 9.402322532    | 8.772731692 | 1.547126154 | Chr:9 26.0 cM   |
| 1422459_a_at | Psmid13       | proteasome (prosome, macropain) 26S         | 1.11E-05 | 10.24305732    | 9.617962864 | 1.542311805 | Chr:7 F4        |
| 1418260_at   | Hunk          | hormonally upregulated Neu-associated       | 1.21E-05 | 10.58993125    | 9.211033732 | 2.600695545 | Chr:16 58.0 cM  |
| 1460330_at   | Anxa3         | annexin A3                                  | 1.21E-05 | 12.95425151    | 11.76215877 | 2.284839365 | Chr:5 54.0 cM   |
| 1448610_a_at | Sod2          | superoxide dismutase 2, mitochondrial       | 1.23E-05 | 11.40904664    | 10.81934032 | 1.504940371 | Chr:17 7.6 cM   |
| 1448529_at   | Thbd          | thrombomodulin                              | 1.24E-05 | 11.46369398    | 9.823671123 | 3.116707705 | Chr:2 84.0 cM   |
| 1426743_at   | Dip3b-pending | Dip3 beta                                   | 1.25E-05 | 9.333911902    | 10.06573428 | 1.660735564 | Chr:10 C1       |
| 1448566_at   | Slc40a1       | solute carrier family 40 (iron-regulated i  | 1.31E-05 | 7.890483252    | 9.34547042  | 2.741541225 | Chr:1 B         |
| 1416445_at   | 2810405J04Rik | RIKEN cDNA 2810405J04 gene                  | 1.50E-05 | 10.0146011     | 9.366062855 | 1.567579103 | Chr:17 E2       |
| 1424737_at   | Thrsp         | thyroid hormone responsive SPOT14 hoi       | 1.55E-05 | 13.5509319     | 11.42572496 | 4.362656671 | Chr:7 E1        |
| 1426611_at   | Psmc2         | proteasome (prosome, macropain) 26S         | 1.62E-05 | 11.25296596    | 10.58179915 | 1.5923603   | Chr:5 9.0 cM    |
| 1415984_at   | Acadm         | acetyl-Coenzyme A dehydrogenase, mer        | 1.66E-05 | 10.68662847    | 11.37574137 | 1.612291829 | Chr:3 73.6 cM   |
| 1426546_at   | Tesk2         | testis-specific kinase 2                    | 1.69E-05 | 6.755676175    | 7.640473861 | 1.846505662 | Chr:4 D1        |
| 1418244_at   | 1500004D14Rik | RIKEN cDNA 1500004D14 gene                  | 1.78E-05 | 10.54384152    | 9.807124086 | 1.66638001  | Chr:2 G1        |
| 1455019_x_at | 5630400A09Rik | RIKEN cDNA 5630400A09 gene                  | 1.79E-05 | 11.2805539     | 10.17880119 | 2.146152675 | Chr:10 C1       |
| 1416606_s_at | D11ErtD175e   | DNA segment, Chr 11, ERATO Doi 175, i       | 1.80E-05 | 10.17971891    | 9.392932694 | 1.725227019 | Chr:11 28.5 cM  |
| 1419817_s_at | D1ErtD161e    | DNA segment, Chr 1, ERATO Doi 161, e        | 1.85E-05 | 7.263358758    | 7.91637324  | 1.572450368 | Chr:1 41.0 cM   |
| 1429379_at   | Xlkd1         | extra cellular link domain-containing 1     | 1.92E-05 | 12.82179544    | 11.6697845  | 2.22234308  | Chr:7 E5        |
| 1422137_at   | 9030623N16Rik | RIKEN cDNA 9030623N16 gene                  | 2.08E-05 | 5.566384175    | 7.191445214 | 3.084552151 | Chr:2 E3        |
| 1423695_at   | 9530090G24Rik | RIKEN cDNA 9530090G24 gene                  | 2.10E-05 | 8.340045607    | 8.976317787 | 1.554307747 | Chr:2 H1        |
| 1420543_at   | ORF28         | open reading frame 28                       | 2.10E-05 | 7.209211605    | 7.996661648 | 1.72602103  | Chr:16 A1       |
| 1418825_at   | Ifi1          | interferon inducible protein 1              | 2.25E-05 | 11.49998817    | 9.876548424 | 3.081087694 | Chr:11 B1.2     |
| 1422818_at   | Nedd9         | neural precursor cell expressed, develop    | 2.26E-05 | 9.47389865     | 10.58608054 | 2.161723331 | Chr:13 A4       |
| 1424182_at   | Acad1         | acetyl-Coenzyme A acetyltransferase 1       | 2.33E-05 | 9.787039964    | 8.684679956 | 2.147056278 | Chr:9 30.0 cM   |
| 1426381_at   | BC013720      | cDNA sequence BC013720                      | 2.50E-05 | 8.219876184    | 7.509648254 | 1.636062576 | Chr:19 C3       |
| 1416048_at   | Phc2          | polyhomeotic-like 2 (Drosophila)            | 2.53E-05 | 10.9416649     | 10.01130294 | 1.905754076 | Chr:4 61.0 cM   |
| 1424464_s_at | AW212394      | expressed sequence AW212394                 | 2.66E-05 | 5.713530494    | 6.931038701 | 2.325447237 | Chr:1 C1.1      |
| 1426640_s_at | AW319517      | expressed sequence AW319517                 | 2.66E-05 | 11.60737514    | 9.995324541 | 3.056860248 | Chr:12 A1.1     |
| 1422886_a_at | Clk4          | CDC like kinase 4                           | 2.75E-05 | 8.208330861    | 9.108167159 | 1.865854253 | Chr:11 B1.3     |
| 1433691_at   | Ppp1r3c       | protein phosphatase 1, regulatory (inhibit  | 2.75E-05 | 4.819756573    | 8.823564284 | 16.04228465 | Chr:19 C2       |
| 1437239_x_at | Phc2          | polyhomeotic-like 2 (Drosophila)            | 2.79E-05 | 11.72024614    | 10.90697066 | 1.757196435 | Chr:4 61.0 cM   |
| 1418285_at   | Efnb1         | ephrin B1                                   | 2.83E-05 | 7.117178637    | 8.268941582 | 2.221852346 | Chr:X 37.0 cM   |
| 1451542_at   | Ssbp2         | single-stranded DNA binding protein 2       | 2.94E-05 | 6.816991137    | 7.9288524   | 2.161242958 | Chr:13 C3       |
| 1426499_at   | Sh3glb2       | SH3-domain GRB2-like endophilin B2          | 3.11E-05 | 11.38283025    | 10.49204005 | 1.854191434 | Chr:2 B         |
| 1416584_at   | Man2b2        | mannosidase 2, alpha B2                     | 3.21E-05 | 7.012625128    | 7.772455998 | 1.693292105 | Chr:5 B2-13.3   |
| 1424645_at   | 9930033H14Rik | RIKEN cDNA 9930033H14 gene                  | 3.23E-05 | 8.570234183    | 9.241211454 | 1.592151113 | Chr:11 E2       |
| 1415907_at   | Ccnd3         | cyclin D3                                   | 3.42E-05 | 11.74414725    | 10.68689487 | 2.080964538 | Chr:17 28.8 cM  |
| 1422973_a_at | Thrsp         | thyroid hormone responsive SPOT14 hoi       | 3.48E-05 | 12.19326238    | 9.789916665 | 5.290285991 | Chr:7 E1        |
| 1425780_a_at | 0610041E09Rik | RIKEN cDNA 0610041E09 gene                  | 3.60E-05 | 10.62133515    | 9.927186799 | 1.617929061 | Chr:13 C3       |
| 1448384_at   | BC003494      | cDNA sequence BC003494                      | 3.69E-05 | 9.052240389    | 8.34986344  | 1.627183493 | Chr:10 C1       |
| 1448028_at   | C530046L02Rik | RIKEN cDNA C530046L02 gene                  | 3.70E-05 | 5.478590339    | 7.007530694 | 2.885738066 | Chr:17 A3.3     |
| 1416485_at   | Timmm23       | translocase of inner mitochondrial meml     | 3.71E-05 | 11.46500873    | 10.76698492 | 1.622281082 | Chr:1 93.5 cM   |
| 1431086_s_at | Pcmt1         | protein-L-isoaspartate (D-aspartate) O-i    | 3.71E-05 | 8.599037403    | 7.864163032 | 1.664252542 | Chr:10 7.0 cM   |
| 1427894_at   | Slit2         | Slit-like 2 (Drosophila)                    | 3.77E-05 | 9.366366861    | 8.504817508 | 1.816988581 | Chr:16 A1       |
| 1421260_a_at | Srm           | spermidine synthase                         | 3.80E-05 | 10.56269358    | 9.345063951 | 2.325642961 | Chr:4 E2        |
| 1416034_at   | Cd24a         | CD24a antigen                               | 3.81E-05 | 11.81357863    | 10.4076551  | 2.649873585 | Chr:10 26.0 cM  |
| 1430005_a_at | 4933430F08Rik | RIKEN cDNA 4933430F08 gene                  | 3.92E-05 | 10.55427867    | 8.641979993 | 3.764083608 | Chr:19 A        |
| 1434380_at   | ---           | Mus musculus diabetic nephropathy-rela      | 3.96E-05 | 11.46460088    | 9.520895853 | 3.846923202 | ---             |
| 1433725_at   | Acvr1b        | activin A receptor, type 1B                 | 4.28E-05 | 8.17922663     | 9.316036924 | 2.198943131 | Chr:15 60.4 cM  |

|              |                |                                             |             |             |             |             |                |
|--------------|----------------|---------------------------------------------|-------------|-------------|-------------|-------------|----------------|
| 1449056_at   | E330009J07Rik  | RIKEN cDNA E330009J07 gene                  | 4.28E-05    | 7.842898315 | 8.642957049 | 1.741172011 | Chr:6 B1       |
| 1426368_at   | Rin2           | Ras and Rab interactor 2                    | 4.35E-05    | 7.160661945 | 7.852611576 | 1.615465154 | Chr:2 G1       |
| 1454862_at   | C820004H04Rik  | RIKEN cDNA C820004H04 gene                  | 4.35E-05    | 9.425718696 | 8.332984942 | 2.132777926 | Chr:16 A1      |
| 1434755_at   | E130012P22Rik  | RIKEN cDNA E130012P22 gene                  | 4.45E-05    | 10.12439793 | 9.174690349 | 1.931481129 | Chr:9 C        |
| 1448250_at   | 9030425E11Rik  | RIKEN cDNA 9030425E11 gene                  | 4.59E-05    | 11.20084505 | 10.24156954 | 1.94433325  | Chr:9 A5.1     |
| 1455626_at   | Hoxa9          | homeo box A9                                | 4.62E-05    | 9.717841399 | 10.6201379  | 1.869038778 | Chr:6 26.32 cM |
| 1429246_a_at | Anxa6          | annexin A6                                  | 4.63E-05    | 9.935445236 | 9.303778995 | 1.549353388 | Chr:11 29.5 cM |
| 1426414_a_at | Rnf7           | ring finger protein 7                       | 4.68E-05    | 11.42571066 | 10.36636665 | 2.083983716 | Chr:9 E3.3     |
| 1451798_at   | Il1rn          | interleukin 1 receptor antagonist           | 4.77E-05    | 6.285602609 | 7.279769037 | 1.991929279 | Chr:2 10.0 cM  |
| 1428029_a_at | C530002L11Rik  | RIKEN cDNA C530002L11 gene                  | 4.93E-05    | 10.10270394 | 10.78422064 | 1.603824967 | Chr:11 A1      |
| 1423115_at   | Siat7f         | sialyltransferase 7 ((alpha-N-acetylneur    | 4.93E-05    | 8.794363633 | 10.16925925 | 2.593491464 | Chr:2 B        |
| 1435184_at   | B430320C24Rik  | RIKEN cDNA B430320C24 gene                  | 5.09E-05    | 10.0923547  | 8.586173283 | 2.840571897 | Chr:15 A1      |
| 1452160_at   | AW558171       | expressed sequence AW558171                 | 5.27E-05    | 7.031131483 | 9.159023316 | 4.370783241 | Chr:3 E1       |
| 1416135_at   | Apex1          | apurinic/apurimidinic endonuclease 1        | 5.43E-05    | 9.170563896 | 8.326305133 | 1.795342087 | Chr:14 18.5 cM |
| 1429692_s_at | Gch            | GTP cyclohydrolase 1                        | 5.57E-05    | 8.121043669 | 6.905327931 | 2.32259792  | Chr:14 19.5 cM |
| 1422612_at   | Hk2            | hexokinase 2                                | 5.69E-05    | 9.687669211 | 9.867885803 | 2.266107956 | Chr:6 34.5 cM  |
| 1421019_at   | 1700021F05Rik  | RIKEN cDNA 1700021F05 gene                  | 5.85E-05    | 9.743100511 | 8.867408097 | 1.83488852  | Chr:10 B2      |
| 1427283_at   | Mil            | myeloid/lymphoid or mixed-lineage leuk      | 5.92E-05    | 8.849500889 | 9.723939958 | 1.833295149 | Chr:9 A5.2     |
| 1453128_at   | Xlkd1          | extra cellular link domain-containing 1     | 5.96E-05    | 12.69015838 | 11.48861932 | 2.299848868 | Chr:7 E3       |
| 1419040_at   | Cyp2d22        | cytochrome P450, family 2, subfamily d      | 6.16E-05    | 8.431282258 | 9.368472924 | 1.914795958 | ---            |
| 1416241_at   | Sec13r         | SEC13 related gene (S. cerevisiae)          | 6.18E-05    | 10.20108821 | 9.431344264 | 1.704967149 | Chr:6 52.5 cM  |
| 1425704_at   | BC022224       | cDNA sequence BC022224                      | 6.19E-05    | 8.675145275 | 9.499718439 | 1.771010988 | Chr:11 C       |
| 1422507_at   | Cstb           | cystatin B                                  | 6.34E-05    | 11.34752967 | 10.67687344 | 1.591796845 | Chr:10 42.0 cM |
| 1451346_at   | Mtap           | methylthioadenosine phosphorylase           | 6.38E-05    | 8.61064948  | 7.738237084 | 1.830721576 | Chr:4 C4       |
| 1424970_at   | Purg           | purine-rich element binding protein G       | 6.44E-05    | 7.17466854  | 8.289147396 | 2.165167827 | Chr:8 A3       |
| 1429360_at   | Klf3           | Kruppel-like factor 3 (basic)               | 6.53E-05    | 8.790855625 | 9.718985937 | 1.902808418 | Chr:5 C3.1     |
| 1423508_at   | Myst4          | MYST histone acetyltransferase (monoc)      | 6.57E-05    | 7.822547708 | 8.820468149 | 1.997119196 | Chr:14 A2      |
| 1425921_a_at | 1810055G02Rik  | RIKEN cDNA 1810055G02 gene                  | 6.70E-05    | 9.344322969 | 7.959580827 | 2.611252814 | Chr:19 A       |
| 1433662_s_at | Timp2          | tissue inhibitor of metalloproteinase 2     | 6.90E-05    | 10.11583802 | 10.96092312 | 1.796370701 | Chr:11 72.0 cM |
| 1423685_at   | Aars           | alanyl-tRNA synthetase                      | 7.43E-05    | 10.32813399 | 9.518253112 | 1.753066693 | Chr:8 E1       |
| 1448558_a_at | Pla2g4a        | phospholipase A2, group IVA (cytosolic,     | 7.53E-05    | 10.51008414 | 8.955594252 | 2.937298502 | Chr:1 76.0 cM  |
| 1416291_at   | Psmc4          | proteasome (prosome, macropain) 26S         | 7.54E-05    | 10.3791234  | 9.780541431 | 1.514227496 | Chr:7 10.0 cM  |
| 1456107_x_at | Snrp116-pendin | U5 small nuclear ribonucleoprotein          | 7.55E-05    | 12.34620099 | 10.58164083 | 3.397703981 | Chr:11 E1      |
| 1424343_a_at | Eif1a          | eukaryotic translation initiation factor 1/ | 7.60E-05    | 9.026076372 | 8.066762963 | 1.944384325 | Chr:18 C       |
| 1427364_a_at | Odc            | ornithine decarboxylase, structural         | 7.61E-05    | 9.941818646 | 8.501364493 | 2.714062892 | Chr:12 6.0 cM  |
| 1423863_at   | Abcf2          | ATP-binding cassette, sub-family F (GCN     | 7.83E-05    | 9.408518931 | 8.466603082 | 1.921077671 | Chr:13 40.0 cM |
| 1422196_at   | Htr5b          | 5-hydroxytryptamine (serotonin) recept      | 7.88E-05    | 8.511839115 | 4.345768356 | 1.795197615 | Chr:1 63.0 cM  |
| 1418439_at   | 2900055D03Rik  | RIKEN cDNA 2900055D03 gene                  | 8.00E-05    | 11.29151285 | 10.55853939 | 1.662061147 | Chr:10 C2      |
| 1450376_at   | Mxi1           | Max interacting protein 1                   | 8.05E-05    | 8.672272154 | 9.448719991 | 1.712908202 | Chr:19 49.5 cM |
| 1430127_a_at | Ccnd2          | cyclin D2                                   | 8.12E-05    | 12.76807105 | 11.51109459 | 2.389943415 | Chr:6 61.1 cM  |
| 1424050_s_at | Fgfr1          | fibroblast growth factor receptor 1         | 8.24E-05    | 11.73524516 | 10.31511554 | 2.676095534 | Chr:8 10.0 cM  |
| 1437325_x_at | Pycs           | pyrroline-5-carboxylate synthetase (glu     | 8.37E-05    | 9.691392097 | 8.87038981  | 1.766632904 | Chr:19 C3      |
| 1429947_a_at | Zbp1           | Z-DNA binding protein 1                     | 8.60E-05    | 11.39206598 | 9.026399574 | 5.153906662 | Chr:2 H4       |
| 1449009_at   | Tgtp           | T-cell specific GTPase                      | 8.73E-05    | 13.84561104 | 12.3098303  | 2.899452977 | Chr:11 B1.2    |
| 1451056_at   | Psmc7          | proteasome (prosome, macropain) 26S         | 8.74E-05    | 9.858041966 | 9.239398458 | 1.535430816 | Chr:8 53.5 cM  |
| 1436680_s_at | Acp2           | acid phosphatase 2, lysosomal               | 8.82E-05    | 6.511026838 | 7.140460503 | 1.546957611 | Chr:2 52.0 cM  |
| 1439959_at   | ---            | Mus musculus transcribed sequence witi      | 9.08E-05    | 6.15823998  | 7.037978411 | 1.840041661 | ---            |
| 1454677_at   | Timp2          | tissue inhibitor of metalloproteinase 2     | 9.11E-05    | 9.722704372 | 10.42975061 | 1.632458415 | Chr:11 72.0 cM |
| 1434150_a_at | 3300001H21Rik  | RIKEN cDNA 3300001H21 gene                  | 9.20E-05    | 8.673657074 | 9.994697642 | 2.498462506 | Chr:15 F1      |
| 1455972_x_at | Hadhsc         | L-3-hydroxyacyl-Coenzyme A dehydroge        | 9.39E-05    | 11.85171468 | 12.67966173 | 1.775157519 | Chr:3 G3       |
| 1434853_x_at | Mkrn1          | makorin, ring finger protein, 1             | 9.48E-05    | 10.08811595 | 10.86257394 | 1.710547293 | Chr:6 B1       |
| 1449001_at   | Ivd            | isovaleryl coenzyme A dehydrogenase         | 9.57E-05    | 8.164785719 | 8.905097241 | 1.67053652  | ---            |
| 1427911_at   | 2610307O08Rik  | RIKEN cDNA 2610307O08 gene                  | 9.70E-05    | 10.77107388 | 9.162905035 | 3.048646445 | Chr:18 B2      |
| 1431591_s_at | G1p2           | interferon, alpha-inducible protein         | 0.000101879 | 11.06880345 | 9.015212671 | 4.151379368 | Chr:4 E2       |
| 1425719_a_at | Nmi            | N-myc (and STAT) interactor                 | 0.000102868 | 10.41329936 | 9.547170687 | 1.822765129 | Chr:2 C1.1     |
| 1428872_at   | 4121402D02Rik  | RIKEN cDNA 4121402D02 gene                  | 0.000105328 | 7.413752315 | 8.146972083 | 1.662344931 | Chr:11 D       |
| 1460196_at   | Cbr1           | carbonyl reductase 1                        | 0.000106037 | 9.24449679  | 10.15389266 | 1.878258813 | Chr:16 67.0 cM |
| 1439423_x_at | U46068         | cDNA sequence U46068                        | 0.000106928 | 8.88810636  | 7.093866564 | 3.468326689 | Chr:2 H1       |
| 1423269_a_at | Nedd4l         | neural precursor cell expressed, develop    | 0.000107715 | 7.414968128 | 9.044982201 | 3.095160179 | Chr:18 E1      |
| 1443874_at   | 2810002I04Rik  | RIKEN cDNA 2810002I04 gene                  | 0.000110493 | 6.916171826 | 8.507305414 | 3.0128599   | Chr:12 D1      |
