# Supplementary material
Source: PubMed Central journal article supplement (PMC1568935)
Supplement: pnas_0511076103_7.pdf [file pnas_0511076103_7.pdf]

**Table 5.** Validation of microarray data by quantitative PCR (Q-PCR) using tumor RNA of placebo and 6- and 24-h imatinib treated mice for Igtp (IFN $\gamma$ -induced GTPase), Slit2 (Slit-like 2), Ccnd2 (cyclin D2), Eifa (eukaryotic translation initiation factor 1A), Abcb1a (P-glycoprotein), Abcg2 (breast cancer resistance protein) and Abcc5 (MRP5).

|        | Treatment | Array<br>FC | Array<br>SD | Q-PCR<br>FC | Q-PCR<br>SD |
|--------|-----------|-------------|-------------|-------------|-------------|
| Igtp   | 6h        | -2.9        | 0.14        | -2.3        | 0.3         |
|        | 24h       | -4.1        | 0.25        | -3          | 0.27        |
| Slit-2 | 6h        | -2.3        | 0.1         | -2.4        | 0.2         |
|        | 24h       | -1.8        | 0.2         | -2.1        | 0.4         |
| Ccnd2  | 24h       | -2.4        | 0.1         | -2          | 0.3         |
| Eifa   | 24h       | -1.8        | 0.35        | -1.5        | 0.35        |
| Abcb1a | 6h        | 3.9         | 0.11        | 2.3         | 2.1         |
|        | 24h       | 4.6         | 0.34        | 3           | 2.5         |
| Abcg2  | 6h        | 1.4         | 0.23        | 1.5         | 0.9         |
|        | 24h       | 1.7         | 0.31        | 1.8         | 1.16        |
| Abcc5  | 6h        | 1.2         | 0.26        | 1.8         | 1.57        |
|        | 24h       | 1.4         | 0.24        | 1.9         | 0.93        |

Array, data from microarray; Q-PCR, data acquired by real time PCR; FC, fold change between placebo and 6- or 24-h imatinib treatment; negative values, down-regulation; positive values, up-regulation; SD, standard deviation.
