# Supplementary material
Source: PubMed Central journal article supplement (PMC1568935)
Supplement: pnas_0511076103_9.pdf [file pnas_0511076103_9.pdf]

Table 6

| probe ID     | Symbol | P value    | rank(pv) | numP placebo | numP 6h | meanSig placebo | meanSig 6h | maxFC      |
|--------------|--------|------------|----------|--------------|---------|-----------------|------------|------------|
| 1427565_a_at | Abcc5  | 0.00955969 | 1574     | 4            | 5       | 6.987621434     | 7.51252915 | 1.43884154 |
| 1428988_at   | Abcc3  | 0.01548748 | 2027     | 5            | 5       | 9.221816042     | 9.91060259 | 1.61192715 |
| 1422906_at   | Abcg2  | 0.02344716 | 2537     | 5            | 5       | 9.052317471     | 9.54215234 | 1.40428414 |
| 1419758_at   | Abcb1a | 0.02620358 | 2689     | 5            | 5       | 6.604747936     | 8.57452667 | 3.91708037 |
| 1419759_at   | Abcb1a | 0.03153918 | 2939     | 5            | 5       | 7.580312524     | 9.27073384 | 3.22750945 |
| 1418043_at   | Abcc5  | 0.19769307 | 7335     | 4            | 5       | 5.758726144     | 5.45616172 | 1.23333475 |
| 1416402_at   | Abcb10 | 0.25813781 | 8184     | 4            | 5       | 8.782989123     | 8.58430647 | 1.14764994 |
| 1416403_at   | Abcb10 | 0.41657492 | 10114    | 5            | 5       | 8.20378512      | 8.05199038 | 1.11095065 |
| 1452233_at   | Abcc1  | 0.46210072 | 10594    | 5            | 5       | 8.77025923      | 8.87148908 | 1.0726875  |
| 1449817_at   | Abcb11 | 0.48192413 | 10793    | 0            | 4       | 5.808319031     | 6.16718913 | 1.28242113 |
| 1449818_at   | Abcb4  | 0.57514057 | 11685    | 5            | 5       | 8.198772729     | 8.09591    | 1.07390229 |
| 1421378_s_at | Abcc1  | 0.92508159 | 14614    | 3            | 3       | 7.809691179     | 7.8367568  | 1.01893754 |
| 1418872_at   | Abcb1b | 0.92709537 | 14636    | 0            | 2       | 4.158772548     | 4.2343638  | 1.05379282 |
| 1418042_a_at | Abcc5  | 0.97806047 | 15057    | 5            | 5       | 9.032224761     | 9.03863562 | 1.00445356 |
| 1421212_at   | Abcc6  | 10         | 18968    | 0            | 0       | 2.826255953     | 4.82977568 | 4.00977067 |
| 1450109_s_at | Abcc2  | 10         | 18968    | 1            | 1       | 5.200855878     | 4.83824463 | 1.28575097 |
| 1454265_a_at | Abcb10 | 10         | 18968    | 0            | 0       | 6.373662301     | 6.0050964  | 1.29106881 |
