# Supplementary material
Source: PubMed Central journal article supplement (PMC1568935)
Supplement: pnas_0511076103_10.pdf [file pnas_0511076103_10.pdf]

Table 7

| probe ID     | Symbol | P value    | rank(pv) | numP placebo | numP 24h | meanSig placebo | meanSig 24h | maxFC      |
|--------------|--------|------------|----------|--------------|----------|-----------------|-------------|------------|
| 1419759_at   | Abcb1a | 0.00162584 | 877      | 5            | 5        | 7.580312524     | 9.809037546 | 4.68719567 |
| 1419758_at   | Abcb1a | 0.00378322 | 1415     | 5            | 5        | 6.604747936     | 9.162079983 | 5.88618158 |
| 1422906_at   | Abcg2  | 0.0040777  | 1462     | 5            | 5        | 9.052317471     | 9.814201769 | 1.69570393 |
| 1416402_at   | Abcb10 | 0.00436501 | 1520     | 4            | 5        | 8.782989123     | 8.093561147 | 1.61264398 |
| 1428988_at   | Abcc3  | 0.0175973  | 3074     | 5            | 5        | 9.221816042     | 9.875202935 | 1.57285633 |
| 1427565_a_at | Abcc5  | 0.02476195 | 3641     | 4            | 5        | 6.987621434     | 7.441315895 | 1.3695429  |
| 1418042_a_at | Abcc5  | 0.04903947 | 4845     | 5            | 5        | 9.032224761     | 9.303728292 | 1.20706514 |
| 1416403_at   | Abcb10 | 0.10090253 | 6402     | 5            | 5        | 8.20378512      | 7.907098875 | 1.22831982 |
| 1449817_at   | Abcb11 | 0.16602458 | 7739     | 0            | 2        | 5.808319031     | 6.522846643 | 1.64094583 |
| 1450109_s_at | Abcc2  | 0.17838343 | 7928     | 1            | 2        | 5.200855878     | 5.607006304 | 1.32514518 |
| 1418872_at   | Abcb1b | 0.24508016 | 8822     | 0            | 2        | 4.158772548     | 5.061683154 | 1.86983453 |
| 1418043_at   | Abcc5  | 0.45139188 | 10976    | 4            | 5        | 5.758726144     | 5.878894853 | 1.08686195 |
| 1452233_at   | Abcc1  | 0.55824375 | 11789    | 5            | 5        | 8.77025923      | 8.650441416 | 1.08659764 |
| 1421378_s_at | Abcc1  | 0.81435122 | 13604    | 3            | 0        | 7.809691179     | 7.86304428  | 1.03767388 |
| 1449818_at   | Abcb4  | 0.9148243  | 14308    | 5            | 5        | 8.198772729     | 8.217774419 | 1.01325809 |
| 1421212_at   | Abcc6  | 10         | 18793    | 0            | 0        | 2.826255953     | 4.645908579 | 3.52996193 |
| 1454265_a_at | Abcb10 | 10         | 18793    | 0            | 0        | 6.373662301     | 6.51035455  | 1.09938161 |
