# Supplementary material
Source: PubMed Central journal article supplement (PMC1568935)
Supplement: pnas_0511076103_11.pdf [file pnas_0511076103_11.pdf]

**Table 8**

| <b><u>Gene name</u></b> | <b><u>Clone title</u></b>                                                  | <b><u>Present (P)/Absent (A)<br/>in mouse GIST</u></b> |
|-------------------------|----------------------------------------------------------------------------|--------------------------------------------------------|
| CTSL                    | cathepsin L                                                                | P                                                      |
| TMSB4X                  | Homo sapiens cDNA FLJ31414 fis, clone NT2NE2000260, weakly similar         | P                                                      |
| HRASLS3                 | HRAS-like suppressor 3                                                     | P                                                      |
| EEF2K                   | elongation factor-2 kinase                                                 | P                                                      |
| C21orf6                 | chromosome 21 open reading frame 6                                         | A                                                      |
| SPARCL1                 | SPARC-like 1 (mast9, hevin)                                                | P                                                      |
| KIT                     | v-kit Hardy-Zuckerman 4 feline sarcoma viral oncogene homolog              | P                                                      |
| AMPD3                   | adenosine monophosphate deaminase (isoform E)                              | P                                                      |
| IGF2                    | Homo sapiens cDNA: FLJ22066 fis, clone HEP10611                            | P                                                      |
| ARPC1B                  | actin related protein 2/3 complex, subunit 1B, 41kDa                       | P                                                      |
| CBR1                    | carbonyl reductase 1                                                       | P                                                      |
| MGLL                    | monoglyceride lipase                                                       | P                                                      |
| BMP4                    | bone morphogenetic protein 4                                               | P                                                      |
| COL6A1                  | collagen, type VI, alpha 1                                                 | P                                                      |
| SMTN                    | smoothelin                                                                 | P                                                      |
| PLAT                    | plasminogen activator, tissue                                              | P                                                      |
| FHL2                    | four and a half LIM domains 2                                              | P                                                      |
| FKBP10                  | FK506 binding protein 10, 65 kDa                                           | P                                                      |
| PRKCZ                   | protein kinase C, zeta                                                     | P                                                      |
| GYG                     | glycogenin                                                                 | P                                                      |
| FADS2                   | fatty acid desaturase 2                                                    | P                                                      |
| PAPSS2                  | 3'-phosphoadenosine 5'-phosphosulfate synthase 2                           | P                                                      |
| PRKCQ                   | protein kinase C, theta                                                    | P                                                      |
| TBL1X                   | transducin (beta)-like 1X-linked                                           | P                                                      |
| NBL1                    | neuroblastoma, suppression of tumorigenicity 1                             | P                                                      |
| ITGA4                   | integrin, alpha 4 (antigen CD49D, alpha 4 subunit of VLA-4 receptor)       | A                                                      |
| PCAF                    | p300/CBP-associated factor                                                 | P                                                      |
| GYPC                    | glycophorin C (Gerbich blood group)                                        | P                                                      |
| PTPN12                  | protein tyrosine phosphatase, non-receptor type 12                         | P                                                      |
| TCIRG1                  | T-cell, immune regulator 1, ATPase, H+ transporting, lysosomal V0 protein  | P                                                      |
| GHR                     | growth hormone receptor                                                    | P                                                      |
| IFITM3                  | interferon induced transmembrane protein 3 (1-8U)                          | P                                                      |
| INPP1                   | inositol polyphosphate-1-phosphatase                                       | P                                                      |
| PFN1                    | profilin 1                                                                 | P                                                      |
| TARBP2                  | TAR (HIV) RNA binding protein 2                                            | P                                                      |
| LYN                     | v-yes-1 Yamaguchi sarcoma viral related oncogene homolog                   | P                                                      |
| ROCK2                   | Rho-associated, coiled-coil containing protein kinase 2                    | A                                                      |
| ADMR                    | adrenomedullin receptor                                                    | P                                                      |
| XPR1                    | xenotropic and polytropic retrovirus receptor                              | P                                                      |
| SMARCA1                 | SWI/SNF related, matrix associated, actin dependent regulator of chromatin | P                                                      |
| BMPR2                   | bone morphogenetic protein receptor, type II (serine/threonine kinase)     | A                                                      |
| MAPK10                  | mitogen-activated protein kinase 10                                        | A                                                      |
| MANBA                   | mannosidase, beta A, lysosomal                                             | P                                                      |
| SFRP1                   | secreted frizzled-related protein 1                                        | P                                                      |
| BCHE                    | butyrylcholinesterase                                                      | A                                                      |
| LOXL2                   | lysyl oxidase-like 2                                                       | A                                                      |
| FBXO3                   | F-box only protein 3                                                       | P                                                      |
| FLJ10853                | hypothetical protein FLJ10853                                              | A                                                      |
| CSTF1                   | cleavage stimulation factor, 3' pre-RNA, subunit 1, 50kDa                  | P                                                      |
| RPS29                   | ESTs                                                                       | P                                                      |

|          |                                                                             |   |
|----------|-----------------------------------------------------------------------------|---|
| NFKB1    | nuclear factor of kappa light polypeptide gene enhancer in B-cells 1 (p105) | P |
| SNAPC3   | small nuclear RNA activating complex, polypeptide 3, 50kDa                  | P |
| BAALC    | brain and acute leukemia, cytoplasmic                                       | P |
| TBK1     | TANK-binding kinase 1                                                       | P |
| TSBP     | likely ortholog of mouse TPR-containing, SH2-binding phosphoprotein         | P |
| DPP4     | dipeptidylpeptidase IV (CD26, adenosine deaminase complexing protein 2)     | A |
| PENK     | proenkephalin                                                               | A |
| DAP      | death-associated protein                                                    | P |
| GUCY1A3  | guanylate cyclase 1, soluble, alpha 3                                       | P |
| CD81     | CD81 antigen (target of antiproliferative antibody 1)                       | P |
| KPNA2    | karyopherin alpha 2 (RAG cohort 1, importin alpha 1)                        | P |
| DT1P1A10 | hypothetical protein DT1P1A10                                               | P |
| TMEM2    | transmembrane protein 2                                                     | P |
| CXX1     | CAAX box 1                                                                  | P |
| SPS2     | selenophosphate synthetase 2                                                | P |
| ITM3     | integral membrane protein 3                                                 | P |
| EGLN2    | egl nine homolog 2 (C. elegans)                                             | P |
| PRKG1    | protein kinase, cGMP-dependent, type I                                      | P |
| FBN1     | fibrillin 1 (Marfan syndrome)                                               | P |
| MRPL38   | mitochondrial ribosomal protein L38                                         | P |
| GUK1     | guanylate kinase 1                                                          | P |
| ADSS     | adenylosuccinate synthase                                                   | P |
| ATP1B2   | ATPase, Na <sup>+</sup> /K <sup>+</sup> transporting, beta 2 polypeptide    | A |
| CAPZB    | capping protein (actin filament) muscle Z-line, beta                        | P |
| GALK1    | galactokinase 1                                                             | P |
| STIM1    | stromal interaction molecule 1                                              | P |
| APLP1    | amyloid beta (A4) precursor-like protein 1                                  | P |
| ARHGAP1  | Rho GTPase activating protein 1                                             | P |
| PHLDA1   | pleckstrin homology-like domain, family A, member 1                         | P |
| PBX3     | Homo sapiens cDNA FLJ34829 fis, clone NT2NE2009426, highly similar t        | A |
| NFE2L1   | nuclear factor (erythroid-derived 2)-like 1                                 | P |
| NDUFA2   | NADH dehydrogenase (ubiquinone) 1 alpha subcomplex, 2, 8kDa                 | P |
| VIL2     | villin 2 (ezrin)                                                            | P |
| CD151    | CD151 antigen                                                               | P |
| KHK      | ketoheksokinase (fructokinase)                                              | P |
| DUSP6    | dual specificity phosphatase 6                                              | P |
| APC7     | anaphase-promoting complex subunit 7                                        | P |
| RAB27A   | RAB27A, member RAS oncogene family                                          | A |
| NR2F6    | nuclear receptor subfamily 2, group F, member 6                             | P |
| GNG2     | guanine nucleotide binding protein (G protein), gamma 2                     | P |
| NDUFB7   | NADH dehydrogenase (ubiquinone) 1 beta subcomplex, 7, 18kDa                 | P |
| UQCR     | ubiquinol-cytochrome c reductase (6.4kD) subunit                            | P |
| ORM2     | orosomuroid 2                                                               | A |
| PSMB6    | proteasome (prosome, macropain) subunit, beta type, 6                       | P |
| OAZ1     | ESTs, Highly similar to 2102231B Orn decarboxylase antizyme [Homo sap       | P |
| TK1      | thymidine kinase 1, soluble                                                 | A |
| SGNE1    | secretory granule, neuroendocrine protein 1 (7B2 protein)                   | P |
| RGS19IP1 | regulator of G-protein signalling 19 interacting protein 1                  | P |
| LGALS8   | lectin, galactoside-binding, soluble, 8 (galectin 8)                        | P |
| OASIS    | old astrocyte specifically induced substance                                | A |
| AES      | amino-terminal enhancer of split                                            | P |
| ABHD3    | abhydrolase domain containing 3                                             | A |
| SP100    | nuclear antigen Sp100                                                       | P |
| PICALM   | phosphatidylinositol binding clathrin assembly protein                      | P |
| MCP      | membrane cofactor protein (CD46, trophoblast-lymphocyte cross-reactive ε    | A |

|          |                                                                           |   |
|----------|---------------------------------------------------------------------------|---|
| COX6A1   | cytochrome c oxidase subunit VIa polypeptide 1                            | P |
| IDH1     | isocitrate dehydrogenase 1 (NADP+), soluble                               | P |
| NUBP1    | nucleotide binding protein 1 (MinD homolog, E. coli)                      | P |
| SRI      | sorcin                                                                    | P |
| CABYR    | calcium-binding tyrosine-(Y)-phosphorylation regulated (fibrousheathin 2) | A |
| ATP5B    | ATP synthase, H+ transporting, mitochondrial F1 complex, beta polypeptide | P |
| DLL1     | delta-like 1 (Drosophila)                                                 | P |
| RAB28    | RAB28, member RAS oncogene family                                         | P |
| DCLRE1A  | DNA cross-link repair 1A (PSO2 homolog, S. cerevisiae)                    | P |
| CACNA1D  | calcium channel, voltage-dependent, L type, alpha 1D subunit              | P |
| GCC1     | golgi coiled coil 1                                                       | P |
| TCF21    | transcription factor 21                                                   | P |
| NDUFA7   | NADH dehydrogenase (ubiquinone) 1 alpha subcomplex, 7, 14.5kDa            | P |
| MYOC     | myocilin, trabecular meshwork inducible glucocorticoid response           | A |
| NDUFA9   | NADH dehydrogenase (ubiquinone) 1 alpha subcomplex, 9, 39kDa              | P |
| CA2      | carbonic anhydrase II                                                     | P |
| RAB2     | RAB2, member RAS oncogene family                                          | P |
| ATP6V0E  | ATPase, H+ transporting, lysosomal 9kDa, V0 subunit e                     | P |
| SNTG1    | syntrophin, gamma 1                                                       | A |
| HDAC7A   | histone deacetylase 7A                                                    | P |
| OXR1     | oxidation resistance 1                                                    | P |
| NOL1     | nucleolar protein 1, 120kDa                                               | P |
| ITPKB    | inositol 1,4,5-trisphosphate 3-kinase B                                   | P |
| AP2S1    | adaptor-related protein complex 2, sigma 1 subunit                        | P |
| LAMP1    | lysosomal-associated membrane protein 1                                   | P |
| COX5B    | cytochrome c oxidase subunit Vb                                           | P |
| TNFSF12  | tumor necrosis factor (ligand) superfamily, member 12                     | P |
| VEGFB    | vascular endothelial growth factor B                                      | P |
| NEK7     | NIMA (never in mitosis gene a)-related kinase 7                           | P |
| GNB4     | guanine nucleotide binding protein beta subunit 4                         | P |
| CETN3    | centrin, EF-hand protein, 3 (CDC31 homolog, yeast)                        | P |
| NDUFB2   | NADH dehydrogenase (ubiquinone) 1 beta subcomplex, 2, 8kDa                | P |
| ATBF1    | AT-binding transcription factor 1                                         | P |
| S100A1   | S100 calcium binding protein A1                                           | P |
| SLC26A6  | solute carrier family 26, member 6                                        | A |
| SPRR2A   | small proline-rich protein 2A                                             | P |
| ARL1     | ADP-ribosylation factor-like 1                                            | A |
| ATP6V1H  | ATPase, H+ transporting, lysosomal 50/57kDa, V1 subunit H                 | P |
| SLC29A1  | solute carrier family 29 (nucleoside transporters), member 1              | P |
| MRPL34   | mitochondrial ribosomal protein L34                                       | P |
| SLC25A13 | solute carrier family 25, member 13 (citrin)                              | A |
| PEG10    | paternally expressed 10                                                   | A |
| COPE     | coatamer protein complex, subunit epsilon                                 | P |
| PTPRN2   | protein tyrosine phosphatase, receptor type, N polypeptide 2              | A |
| COL11A2  | collagen, type XI, alpha 2                                                | A |
| APLP2    | amyloid beta (A4) precursor-like protein 2                                | P |
| MIR16    | membrane interacting protein of RGS16                                     | P |
| FLJ12770 | hypothetical protein FLJ12770                                             | A |
| SERPINB9 | serine (or cysteine) proteinase inhibitor, clade B (ovalbumin), member 9  | P |
| SGCE     | sarcoglycan, epsilon                                                      | P |
| POLR2C   | polymerase (RNA) II (DNA directed) polypeptide C, 33kDa                   | P |
| DC13     | DC13 protein                                                              | P |
| UBQLN2   | ubiquilin 2                                                               | P |
| STAM2    | signal transducing adaptor molecule (SH3 domain and ITAM motif) 2         | P |
| PANX1    | pannexin 1                                                                | P |

|         |                                                                            |   |
|---------|----------------------------------------------------------------------------|---|
| ETV5    | ets variant gene 5 (ets-related molecule)                                  | P |
| SMPD1   | sphingomyelin phosphodiesterase 1, acid lysosomal (acid sphingomyelinase)  | P |
| HAGH    | hydroxyacyl glutathione hydrolase                                          | P |
| CYP27A1 | cytochrome P450, subfamily XXVIIA (steroid 27-hydroxylase, cerebrotend     | P |
| EPN2    | epsin 2                                                                    | P |
| CHPT1   | choline phosphotransferase 1                                               | P |
| TCF21   | transcription factor 21                                                    | P |
| TSG     | twisted gastrulation                                                       | P |
| TCEB2   | transcription elongation factor B (SIII), polypeptide 2 (18kDa, elongin B) | P |
| MAGEB2  | melanoma antigen, family B, 2                                              | A |
| CKAP4   | cytoskeleton-associated protein 4                                          | P |
| ATP2A3  | ATPase, Ca <sup>++</sup> transporting, ubiquitous                          | P |
| TTC1    | tetratricopeptide repeat domain 1                                          | P |
