# Supplementary material
Source: PubMed Central journal article supplement (PMC1568935)
Supplement: pnas_0511076103_14.pdf [file pnas_0511076103_14.pdf]

## Supporting Text

**Real-Time PCR.** Assay ID for: Igtp, Mm00497611\_m1; Slit12, Mm00454838\_m1; Ccnd2, Mm00438071\_m1; Eif1a, Mm00456651\_m1; Abcb1a, Mm00440761\_m1; Abcg2, Mm00496364\_m1; Abcc5, Mm00443360\_m1). Primers were chosen based on their ability to span the most 3' exon-exon junction. Amplification was carried for 40 cycles (95°C for 15 sec, 60°C for 1 min). To calculate the efficiency of the PCR and to assess the sensitivity of each assay, we also performed a 7-point standard curve (10; 3.3; 1.1; 0.37; 0.123; 0.041 and 0.015 ng). Triplicate cycle threshold values were averaged, and amounts of target were interpolated from the standard curves and normalized to hypoxanthine guanine phosphoribosyl transferase (HPRT).

**Semiquantitative PCR.** Total RNA from GIST was reverse-transcribed using the SuperScript II Reverse Transcriptase (Invitrogen) according to the manufacturer's instructions. Subsequent dilution of cDNA samples was done to normalize GAPDH PCR before the PCR of the other genes. The reactions were stopped during the exponential phase of amplification. The primer sequences were: 5'-ACCACAGTCCATGCCATCAC-3' and 5'-TCCACCACCCTGTTGCTGTA-3' for GAPDH; 5'-CCCACAGATGTCACAGCCATTC-3' and 5'-CAGCAAGCAAAGCAACAGTGTATG-3' for cyclin D3; 5'-CGTCAGGACCCTAAAGAATGGC -3' and 5'-TCCCCCTTATGGTTCCGATG -3' for p18; 5'- AACAGGCTCCAGCAGGTTACC -3' and 5'-AAGTCCCACAGCACCCACATTGG -3' for ifi1; 5'-TGAACGCCTTTATGGTGTGGTC -3' and 5'-TCCTGGATGAACGGAATCTTGTC -3' for Sox 4; and 5'-CTGAAAGCCCTACCCAAACTGAG -3' and 5'- CCAAGCATCAAACCCAGGAG -3' for FKBP1a; 5'- AGAACAATCTGCTGAAGACGCTG -3' and 5'-CAATGAAATGGGTGACTGTGGAG -3' for Tgfb1-4. The annealing temperatures

were 55.4°C for Sox 4 and FKBP1a; 56°C for p18 and GAPDH; and 57, 58, and 61°C for Ifi1, cyclin D3, and Tgfb1-4, respectively.
