# Supplementary material
Source: PubMed Central journal article supplement (PMC1568935)

7 days 10mg/kg

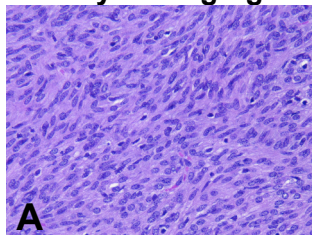

H&E

7 days 10mg/kg

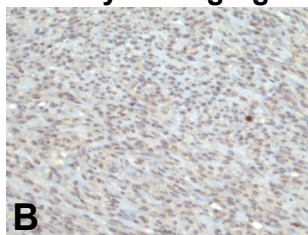

Ki67

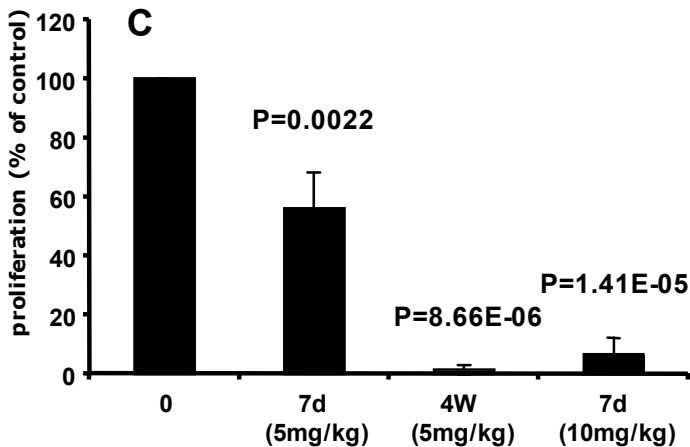

Supplement: pnas_0511076103_12.pdf [file pnas_0511076103_12.pdf]

# Imatinib + RAD001 for 7 days

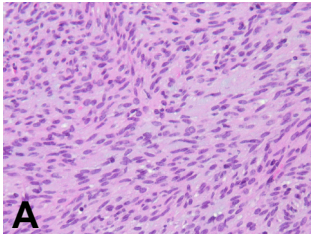

**A**

**mild response**

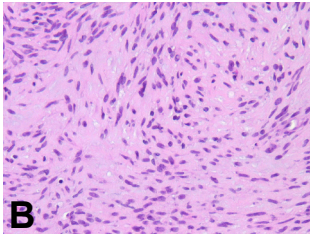

**B**

**moderate response**

Supplement: pnas_0511076103_13.pdf [file pnas_0511076103_13.pdf]

**P-S6 prot**

**Placebo**

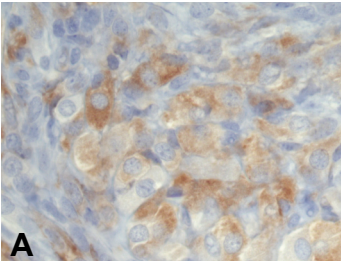

**7d**

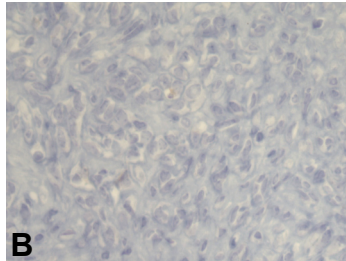

**7d**

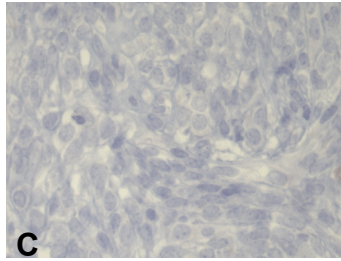

Supplement: pnas_0511076103_15.pdf [file pnas_0511076103_15.pdf]

**Placebo**

**7days**

**Kit**

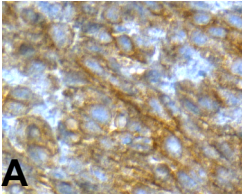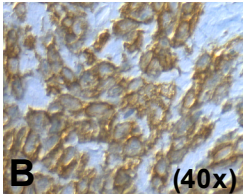

Supplement: pnas_0511076103_2.pdf [file pnas_0511076103_2.pdf]

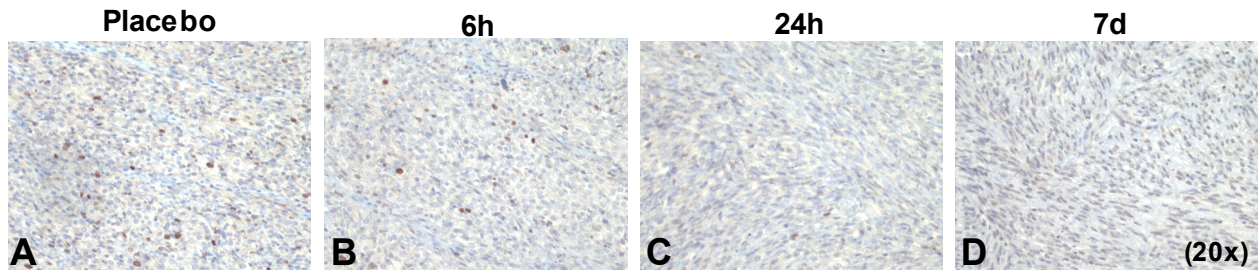

**Ki67**

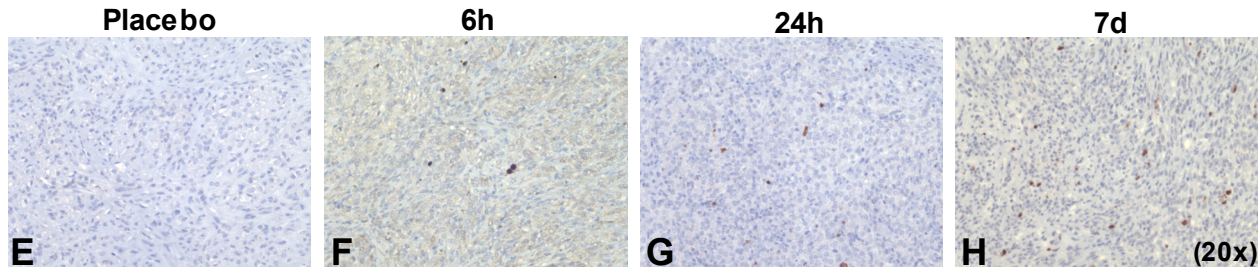

**Cleaved Cas 3**

Supplement: pnas_0511076103_3.pdf [file pnas_0511076103_3.pdf]

**Placebo**

**6h imatinib**

**1**

**2**

**3**

**4**

**5**

**6**

**7**

**8**

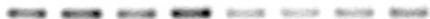

Ccnd3

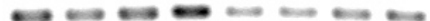

ifi1

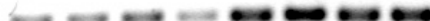

p18

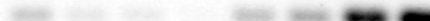

Tgfb1/4

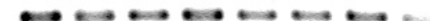

Fkbp1a

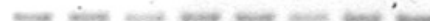

gapdh

Supplement: pnas_0511076103_8.pdf [file pnas_0511076103_8.pdf]
